# Supplementary material for: A facile one pot route for the synthesis of imide tethered peptidomimetics
Source: Royal Society of Chemistry journal article supplement (doi:10.1039/c5ob01708d), 2015-10-20
Supplement: c5ob01708d1.pdf [file c5ob01708d1.pdf]

## **A facile one pot route for the synthesis of imide tethered peptidomimetics**

Veladi Panduranga, Girish Prabhu, Roopesh Kumar, Basavaprabhu and Vommina V. Sureshbabu

*Room No.109, Peptide Research Laboratory, Department of Studies in Chemistry, Central College  
Campus, Dr. B. R. Ambedkar Veedhi, Bangalore University, Bangalore 560 001, India.*

E-mail: [sureshbabuvommina@rediffmail.com](mailto:sureshbabuvommina@rediffmail.com), [hariccb@gmail.com](mailto:hariccb@gmail.com), [hariccb@hotmail.com](mailto:hariccb@hotmail.com)

### **General information**

All chemicals were used as obtained from Sigma Aldrich Company, USA. All the solvents were dried and purified using recommended procedures in the literature whenever necessary. High resolution mass spectra were recorded on a Micromass Q-TOF micromass spectrometer and ESMS on LCQ Deca XP MAX using electron spray ionization mode.  $^1\text{H}$  NMR and  $^{13}\text{C}$  NMR spectra were recorded on a Bruker AMX 300 MHz and 100 MHz spectrometer, respectively, at the Indian Institute of Science, Bangalore. RP-HPLC analysis of epimers was carried out by LCQ Deca XP MAX VWD at  $\lambda = 272\text{nm}$ ; flow rate: 1.0 mL/min; column: Thermoscientific C18 synchronis, pore size-5  $\mu\text{m}$ , diameter x length = 4.6 x 250 mm; method: gradient 0.1% TFA water-acetonitrile; acetonitrile 30-100% in 30 min. Melting points were determined in an open capillary and are uncorrected. TLC experiments were done using MERCK TLC aluminum sheets (silica gel 60 F254) and chromatograms were visualized by exposing in iodine chamber or UV-lamp. Column chromatography was performed on silica gel (100-200 mesh) using ethyl acetate and hexane mixtures as eluent.

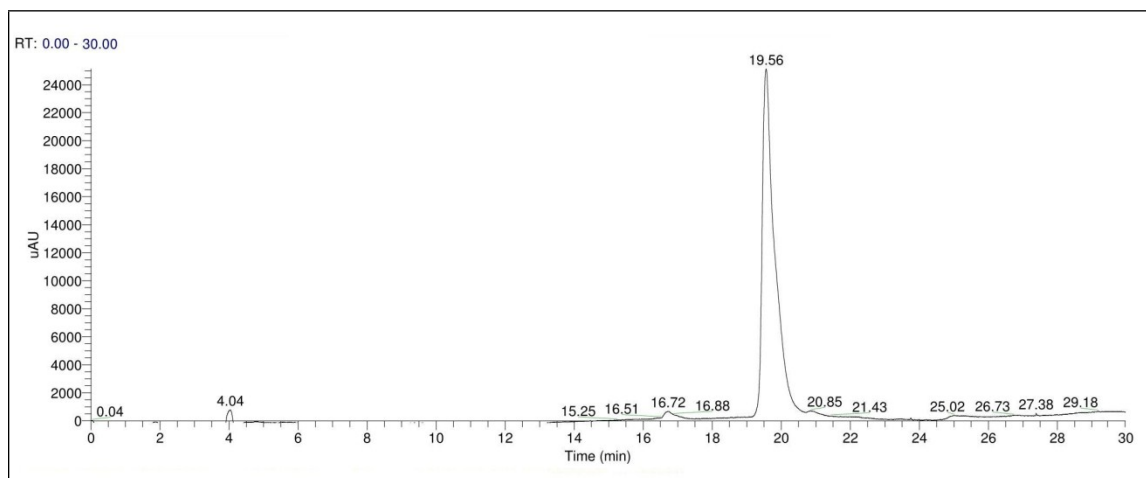

**Racemization study of Fmoc-L-Phg-ψ[CONHCO]-Ala-Boc**

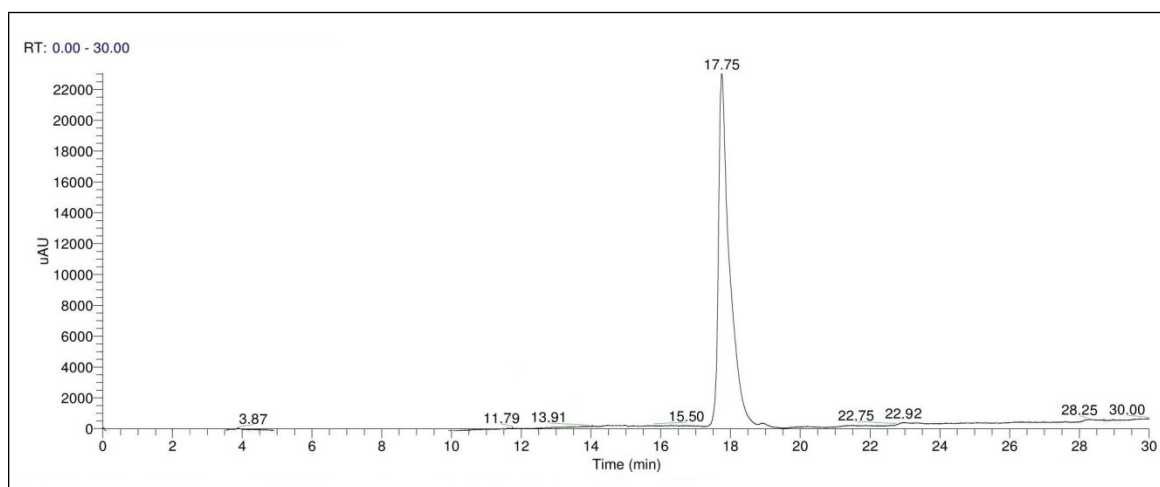

**Racemization study of Fmoc-D-Phg-ψ[CONHCO]-Ala-Boc**

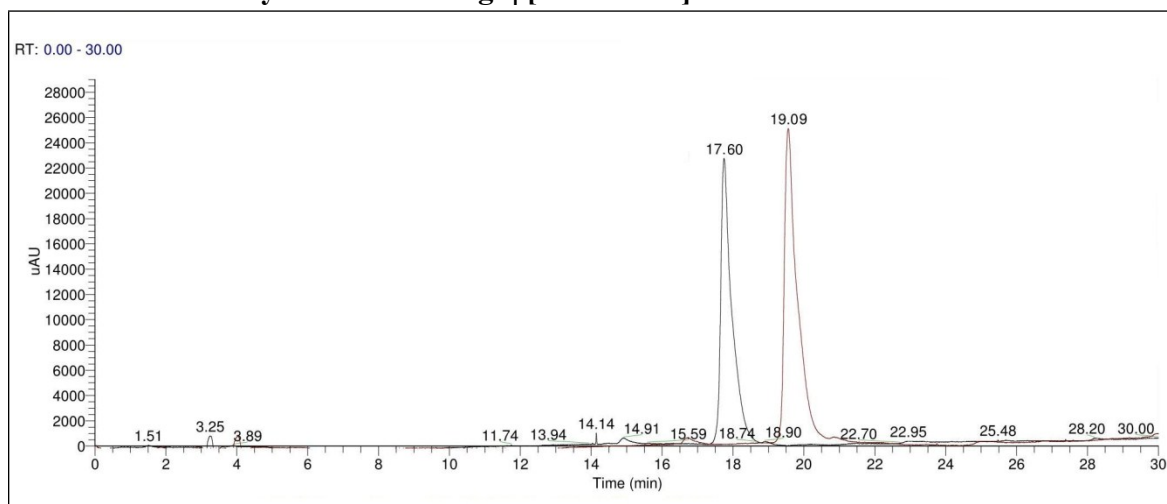

**Racemization**

**on study of Fmoc-L-Phg-ψ[CONHCO]-Ala-Boc and Fmoc-D-Phg-ψ[CONHCO]-Ala-Boc**

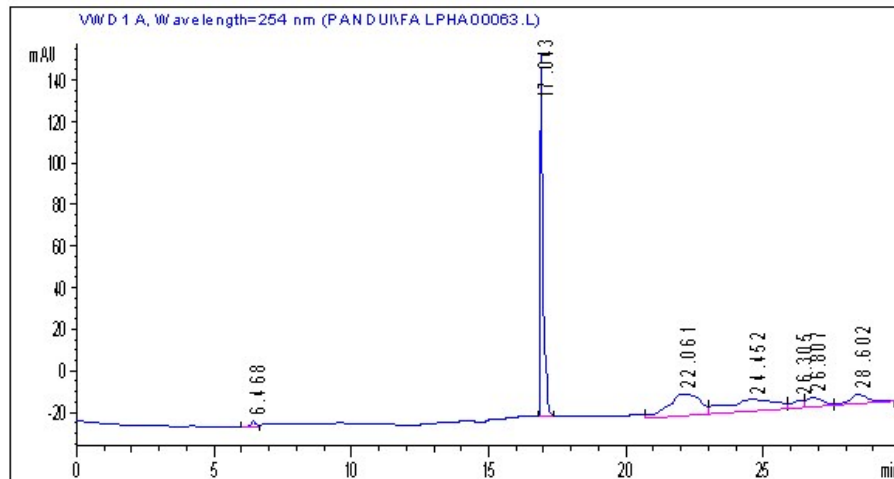

### Racemization study of Fmoc-L-Phe- $\psi$ [CONHCO]-Phe-Ala-Boc

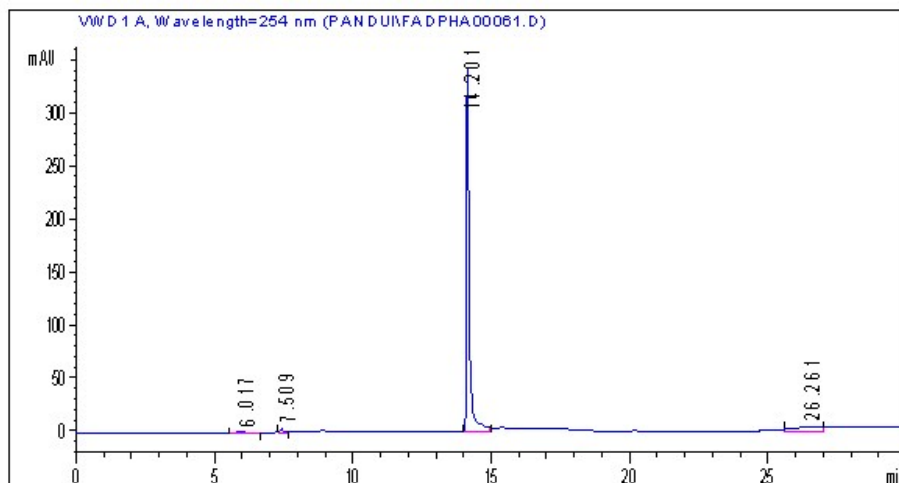

### Racemization study of Fmoc-D-Phe- $\psi$ [CONHCO]-Phe-Ala-Boc

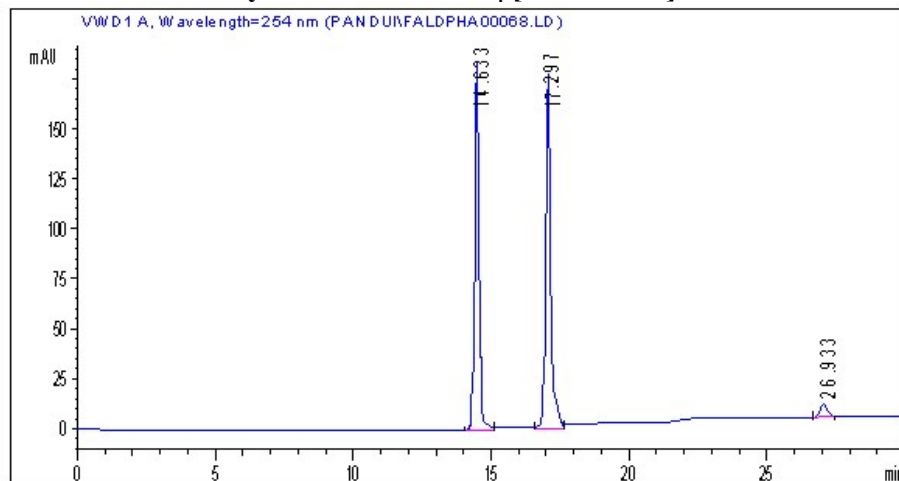

**Racemization study of Fmoc-L-Phe- $\psi$ [CONHCO]-Phe-Ala-Boc and Fmoc-L-Phe- $\psi$ [CONHCO]-Phe-Ala-Boc**

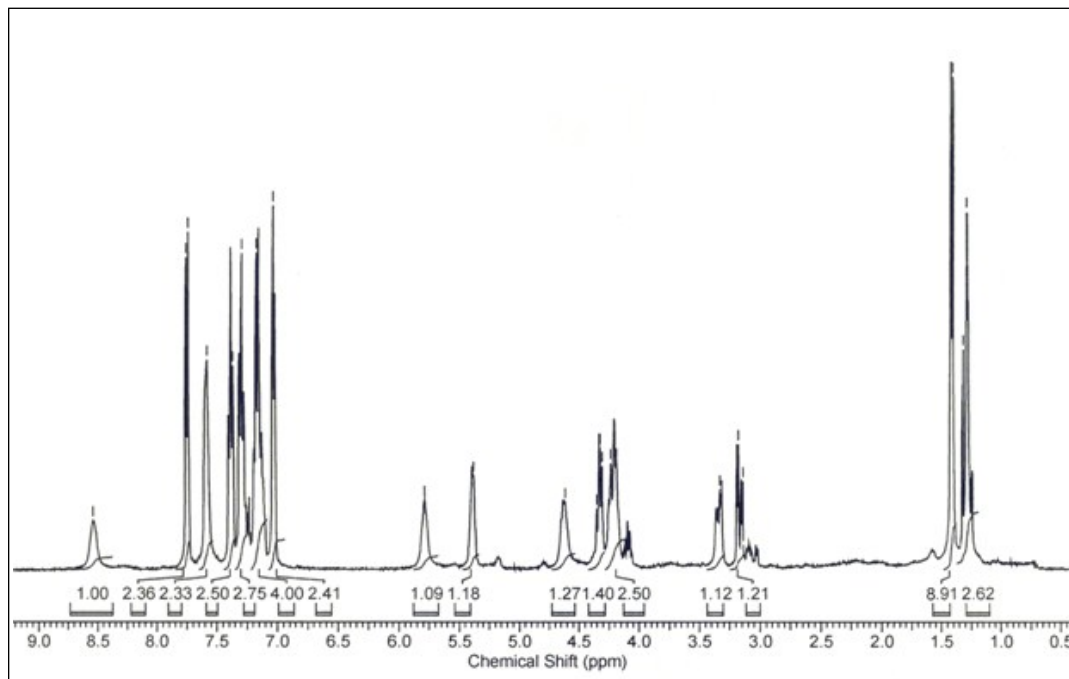

**<sup>1</sup>H NMR Spectrum of Compound Fmoc-Ala- $\psi$ [CONHCO]-Phe-Boc 4a**

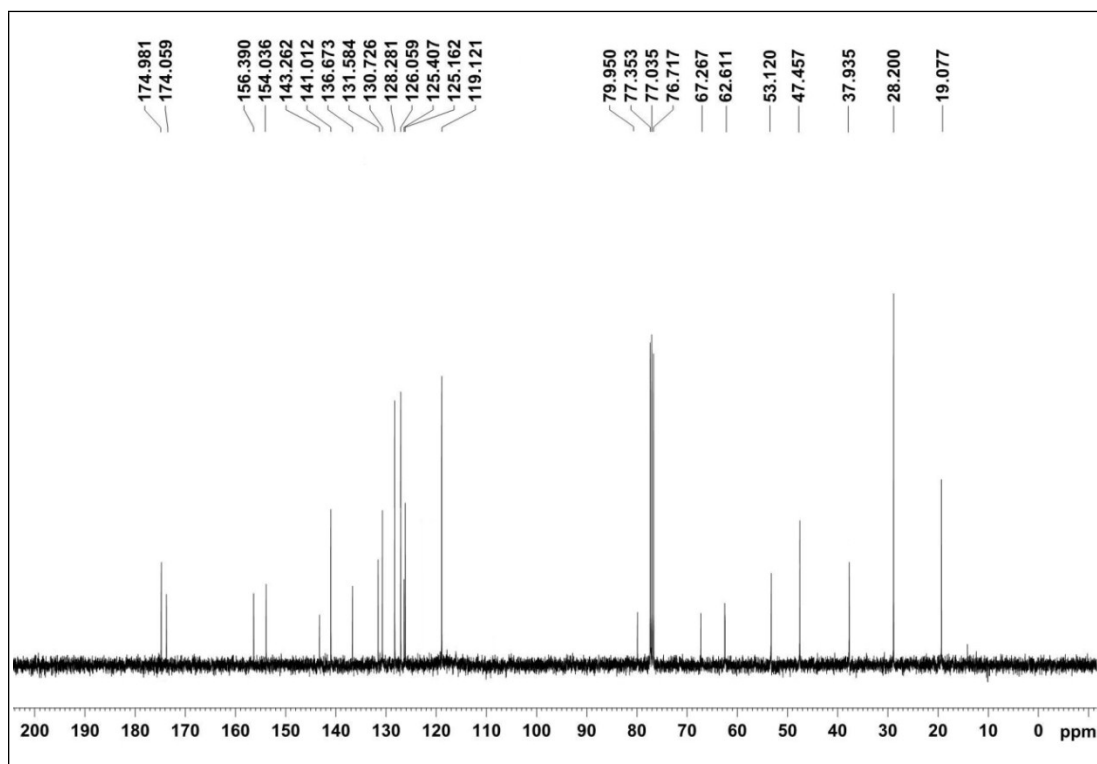

**<sup>13</sup>C NMR Spectrum of Compound Fmoc-Ala- $\psi$ [CONHCO]-Phe-Boc 4a**

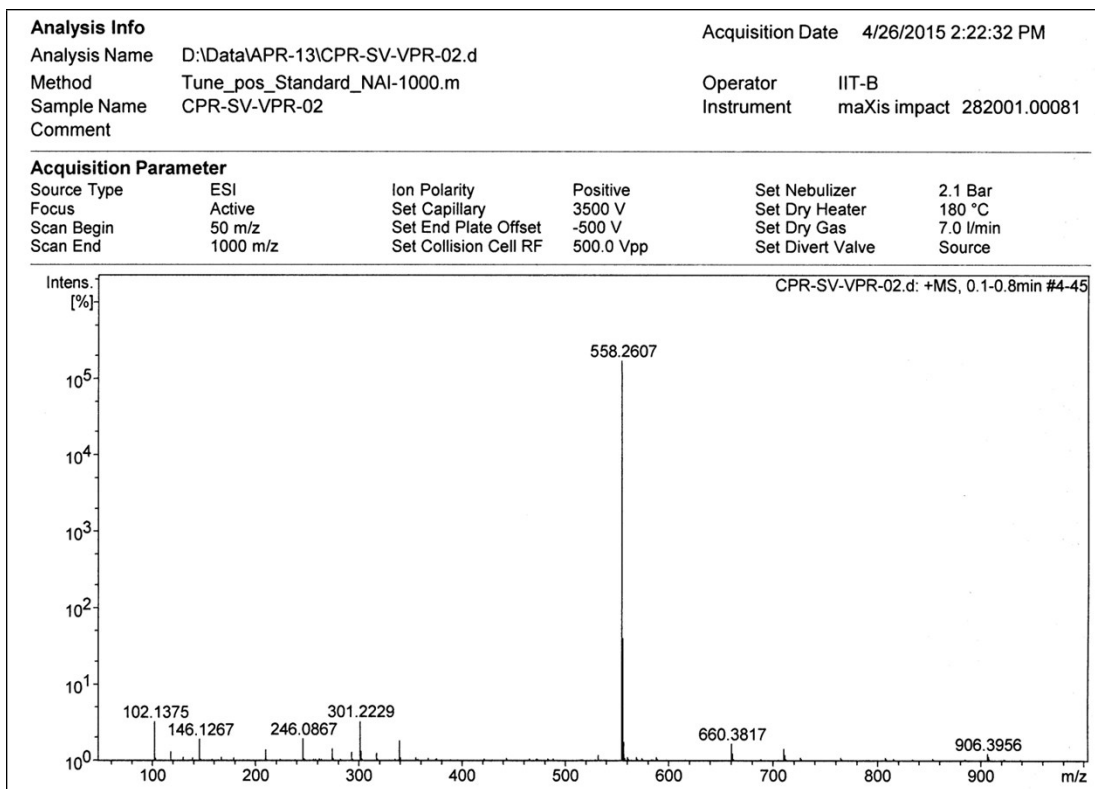

### HRMS of Compound Fmoc-Ala-ψ[CONHCO]-Phe-Boc 4a

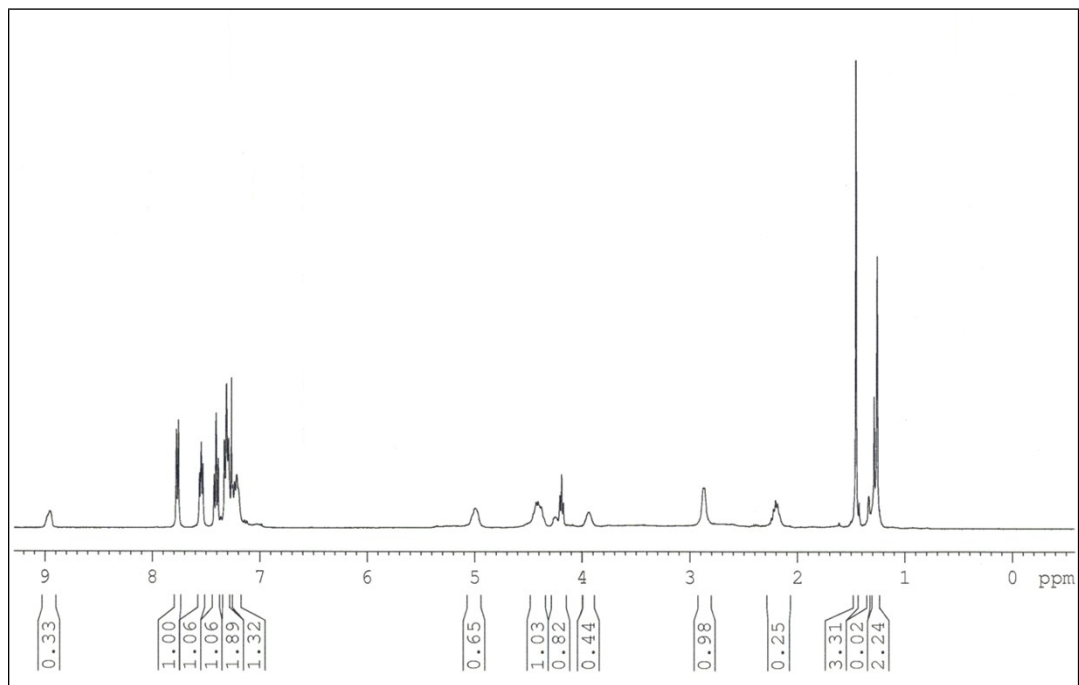

### <sup>1</sup>H NMR Spectrum of Compound Fmoc-Phe-ψ[CONHCO]-Val-Boc 4b

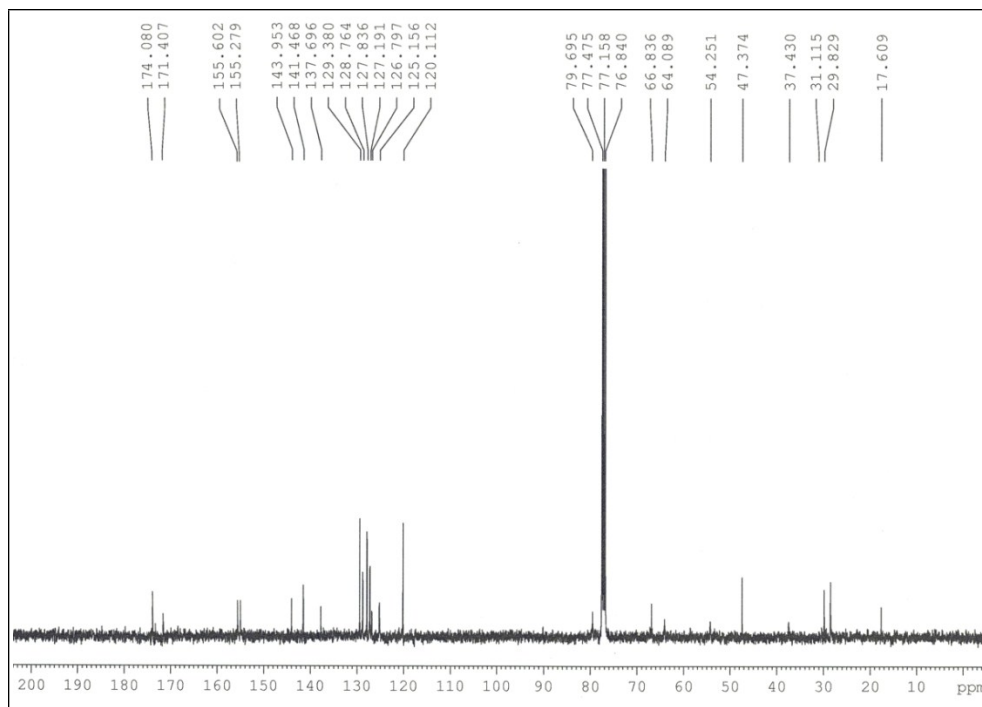

**<sup>13</sup>C NMR Spectrum of Compound Fmoc-Phe-ψ[CONHCO]-Val-Boc 4b**

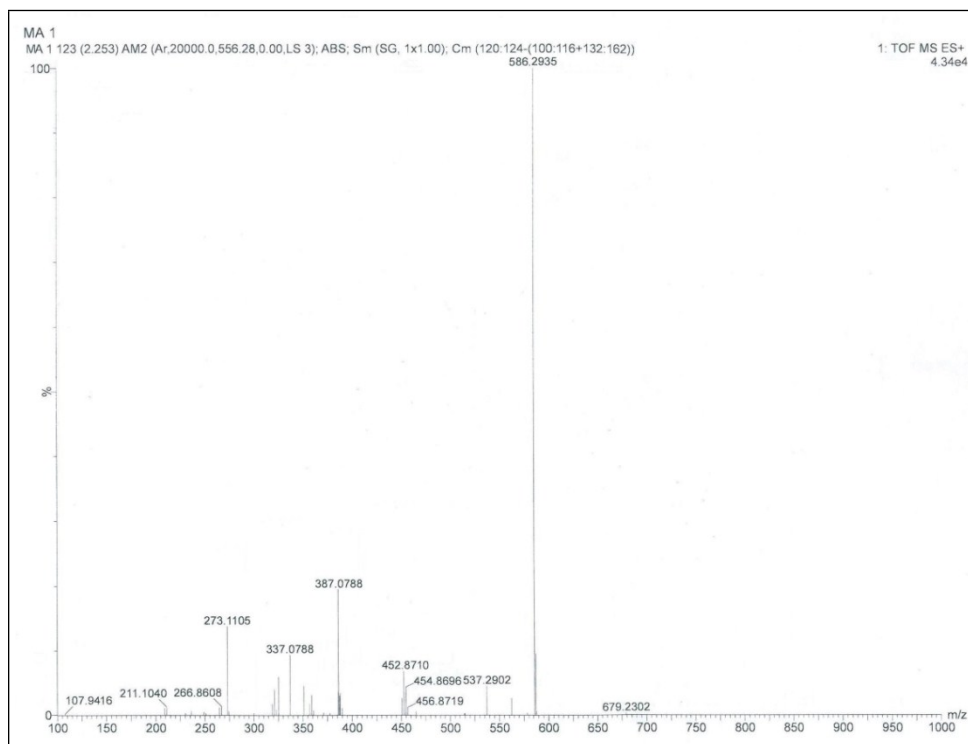

**HRMS of Compound Fmoc-Phe-ψ[CONHCO]-Val-Boc 4b**

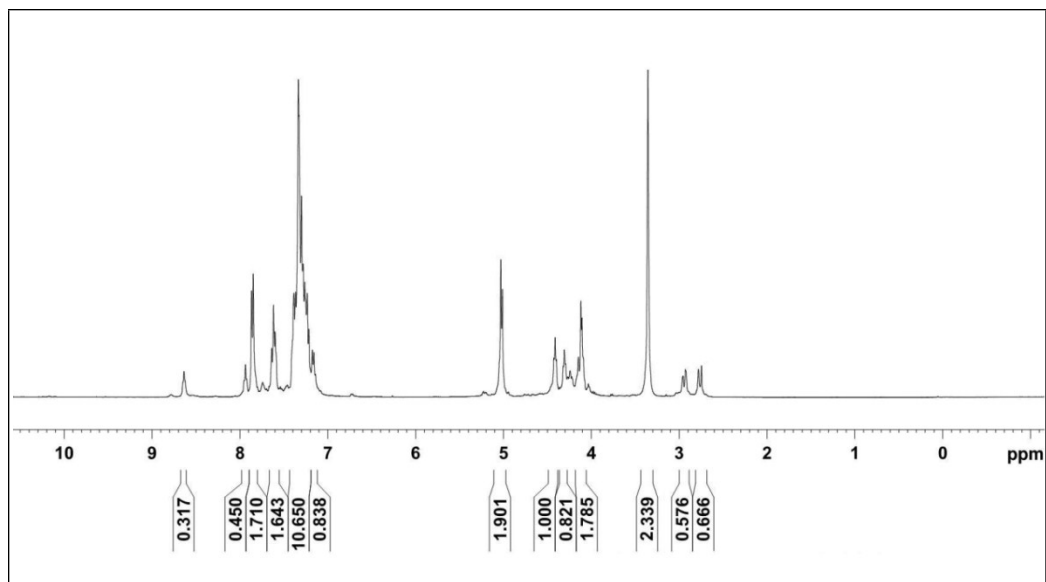

**<sup>1</sup>H NMR Spectrum of Compound Fmoc-Phe-ψ[CONHCO]-Gly-Cbz 4c**

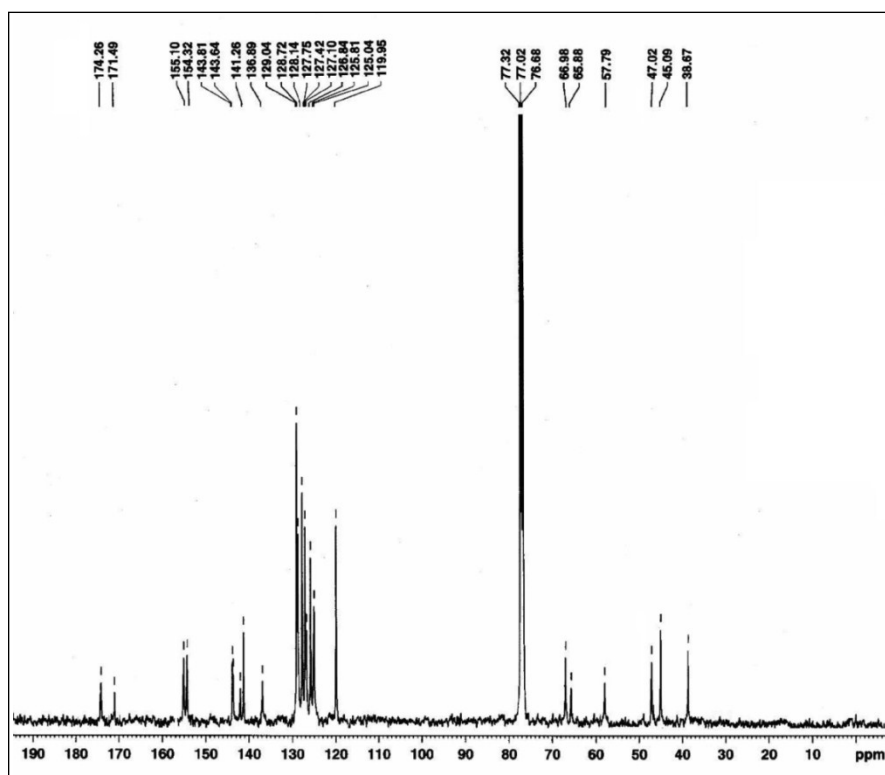

**<sup>13</sup>C NMR Spectrum of Compound Fmoc-Phe-ψ[CONHCO]-Gly-Cbz 4c**

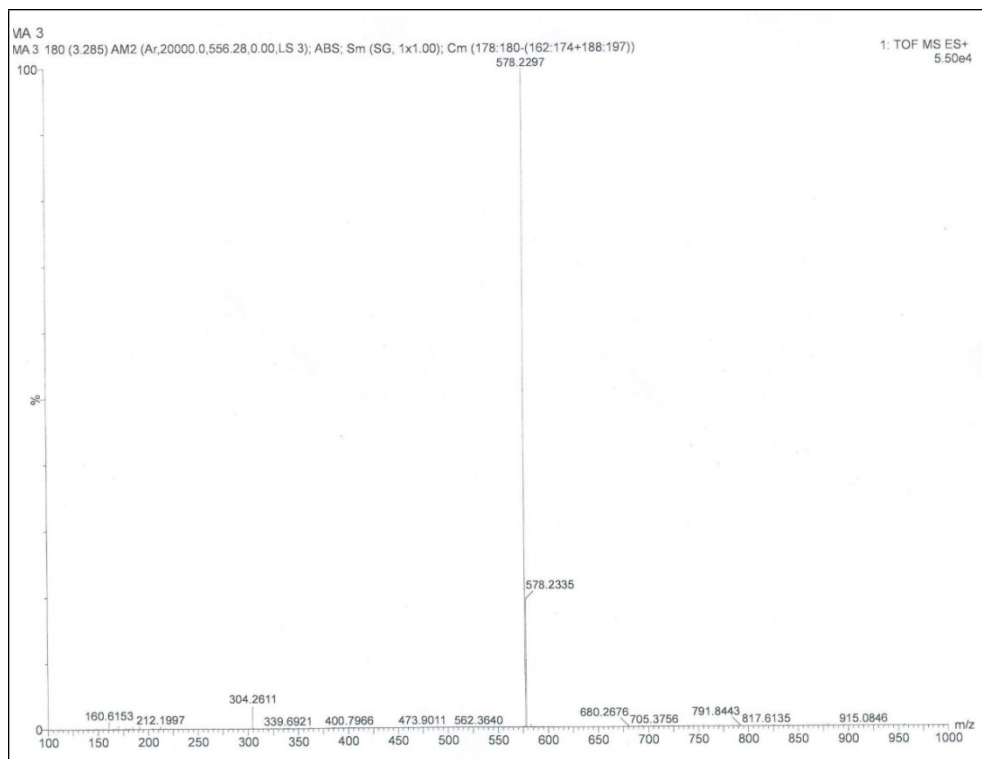

**HRMS of Compound Fmoc-Phe- $\psi$ [CONHCO]-Gly-Cbz 4c**

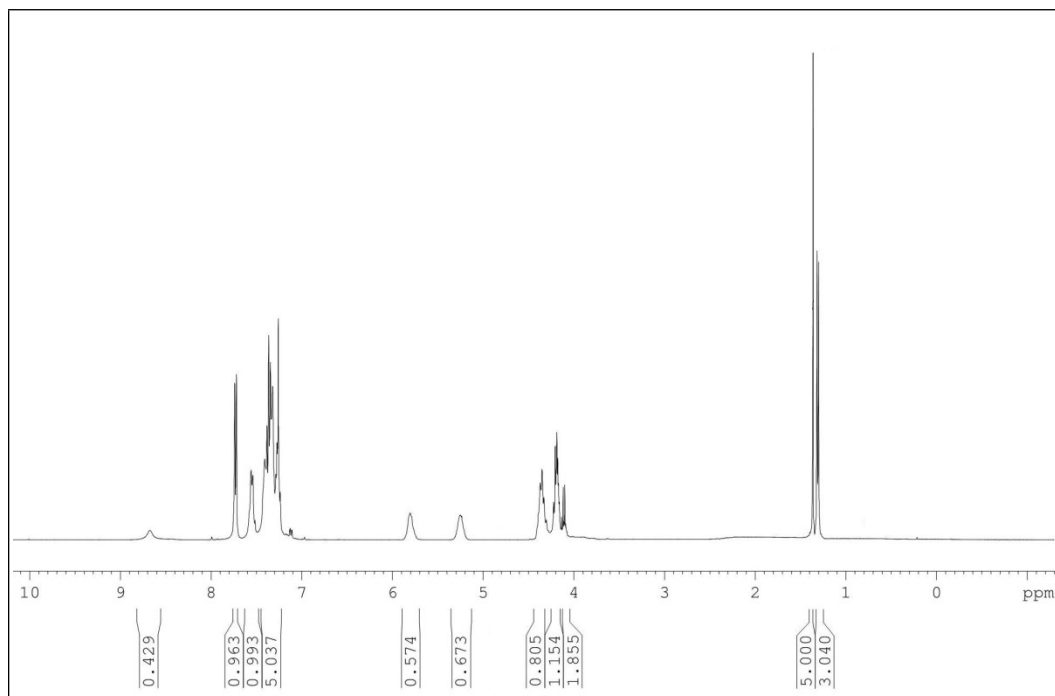

**$^1\text{H}$  NMR Spectrum of Compound Fmoc-Phe- $\psi$ [CONHCO]-Ala-Boc 4d**

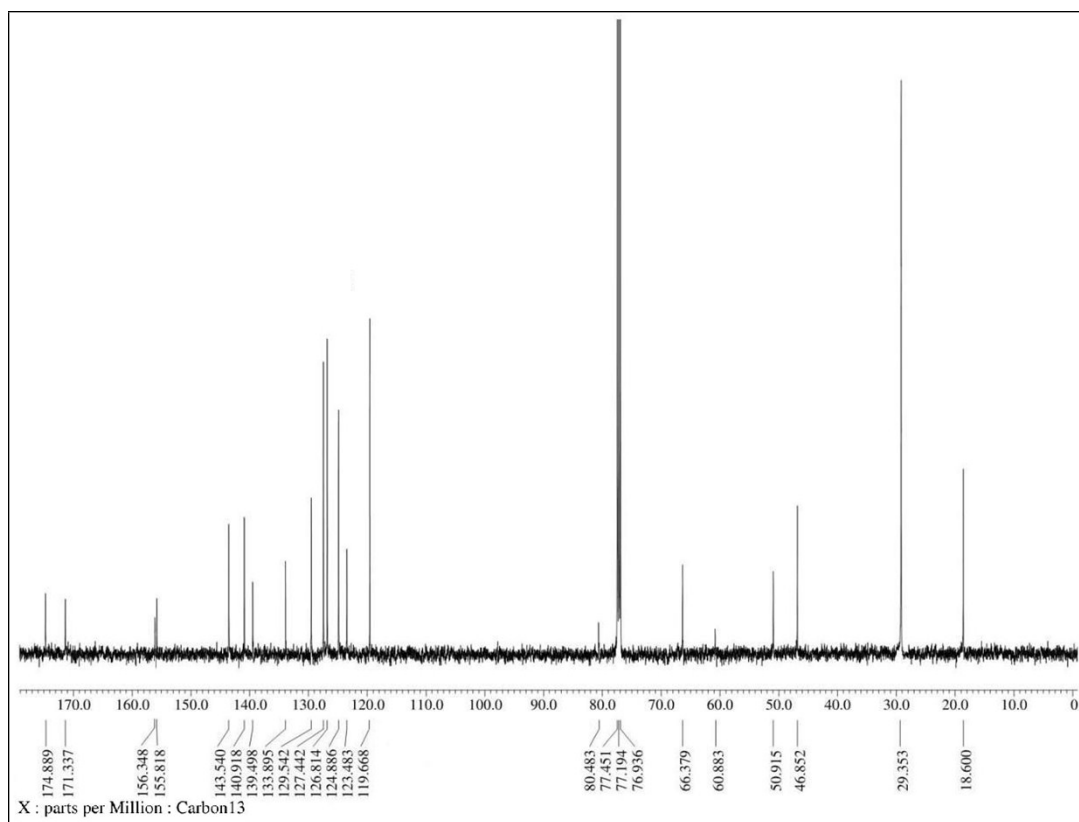

**<sup>13</sup>C NMR Spectrum of Compound Fmoc-Phg-ψ[CONHCO]-Ala-Boc 4d**

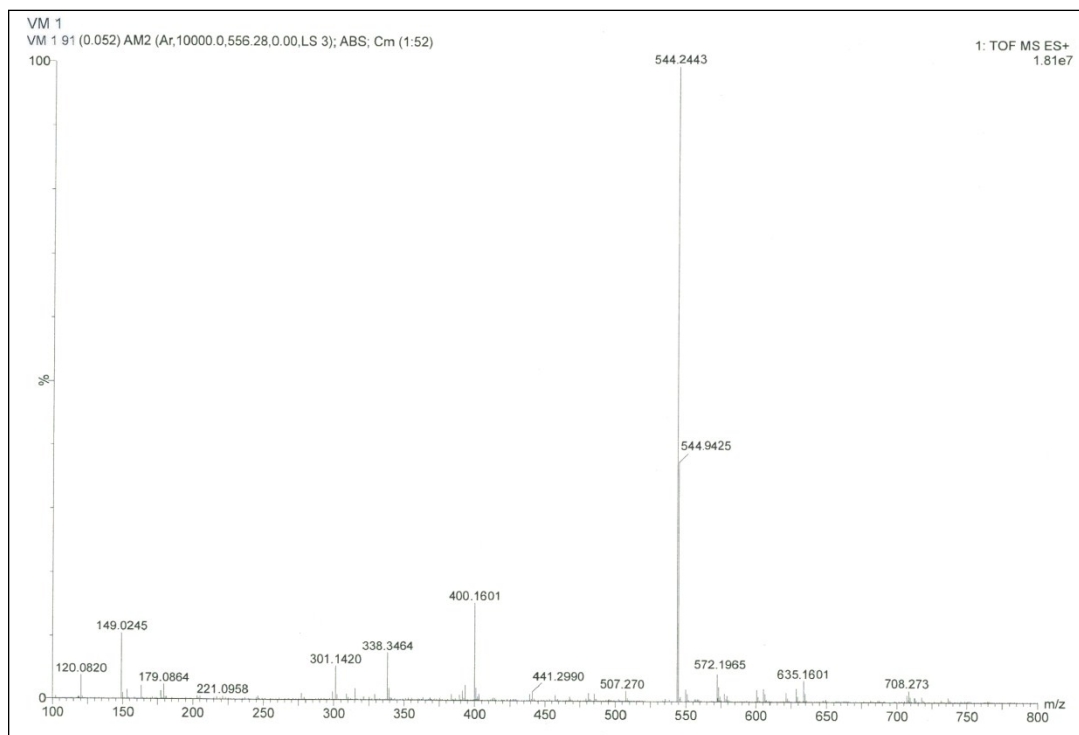

**HRMS of Compound Fmoc-Phg-ψ[CONHCO]-Ala-Boc 4d**

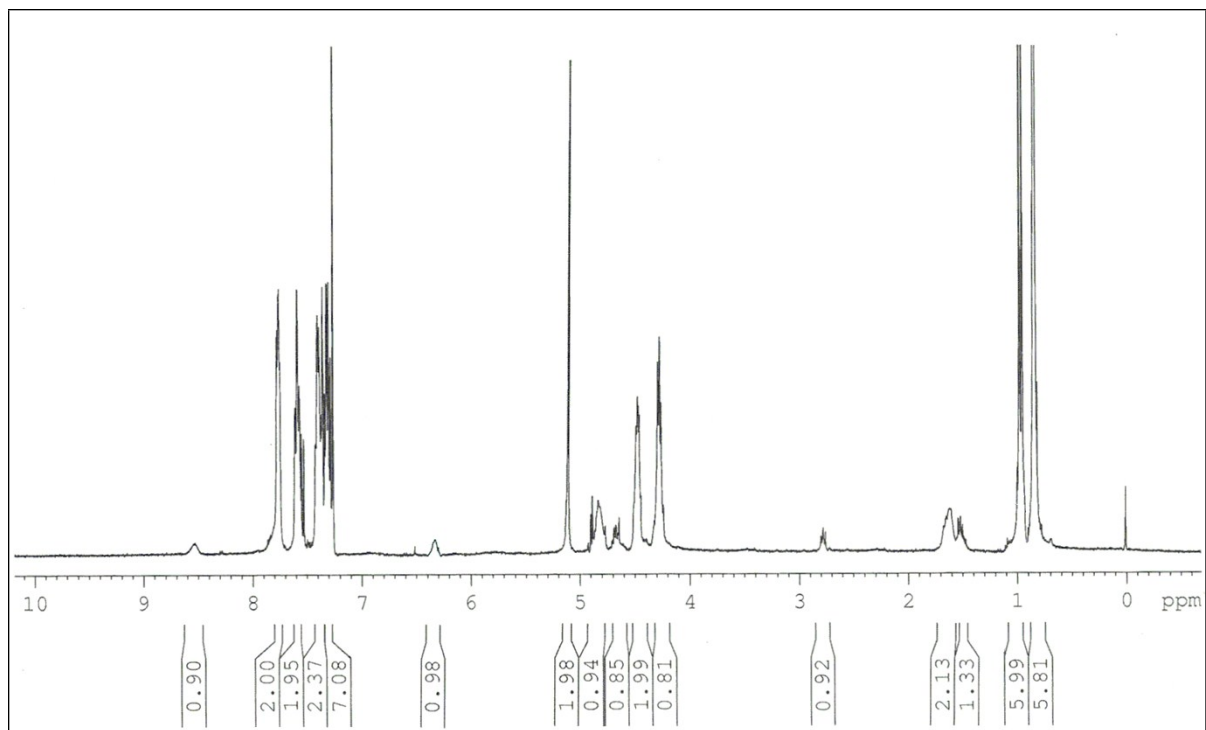

**<sup>1</sup>H NMR Spectrum of Compound Fmoc-Val-ψ[CONHCO]-Leu-Cbz 4e**

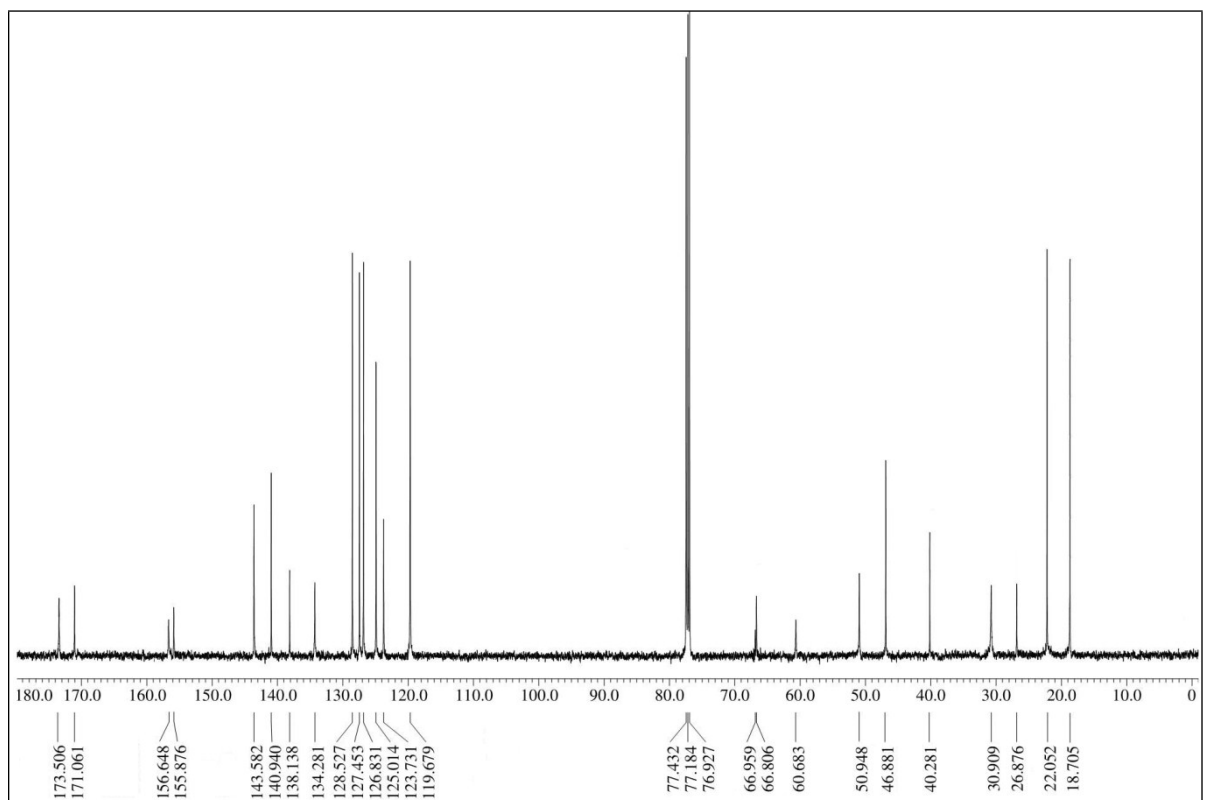

**<sup>13</sup>C NMR Spectrum of Compound Fmoc-Val-ψ[CONHCO]-Leu-Cbz 4e**

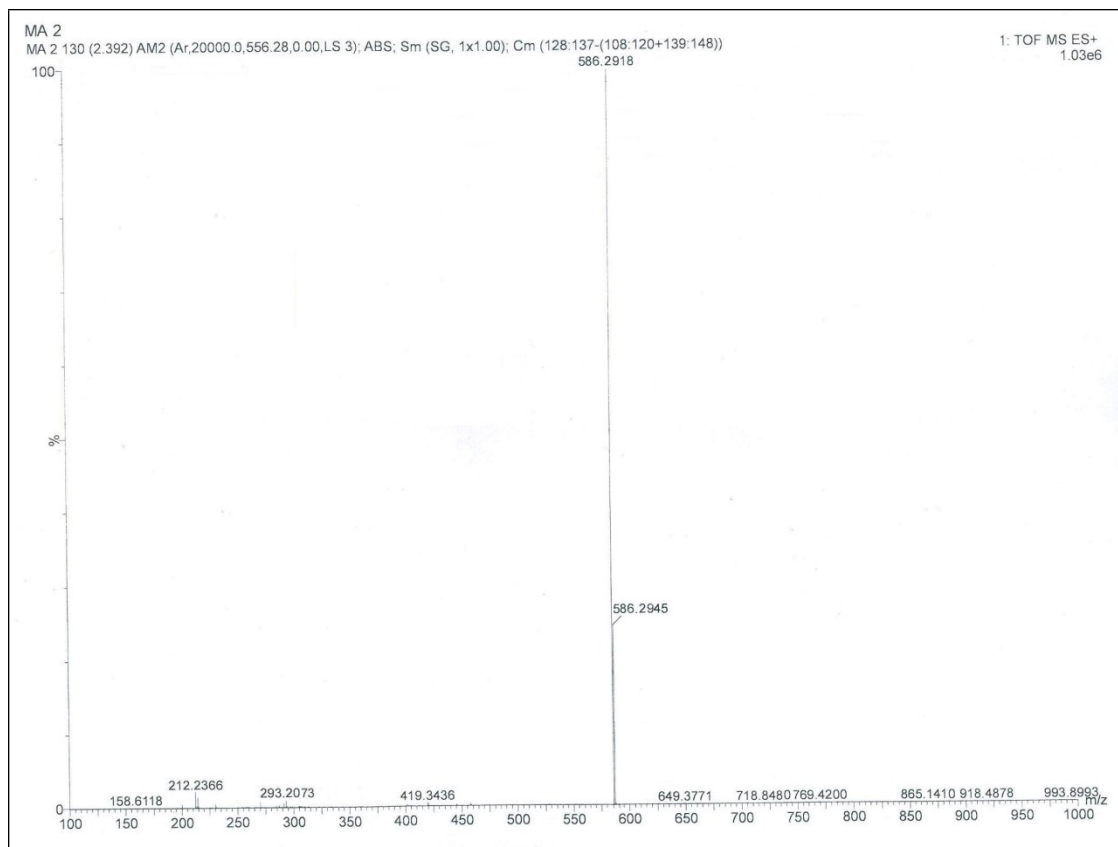

### HRMS of Compound Fmoc-Val- $\psi$ [CONHCO]-Leu-Cbz 4e

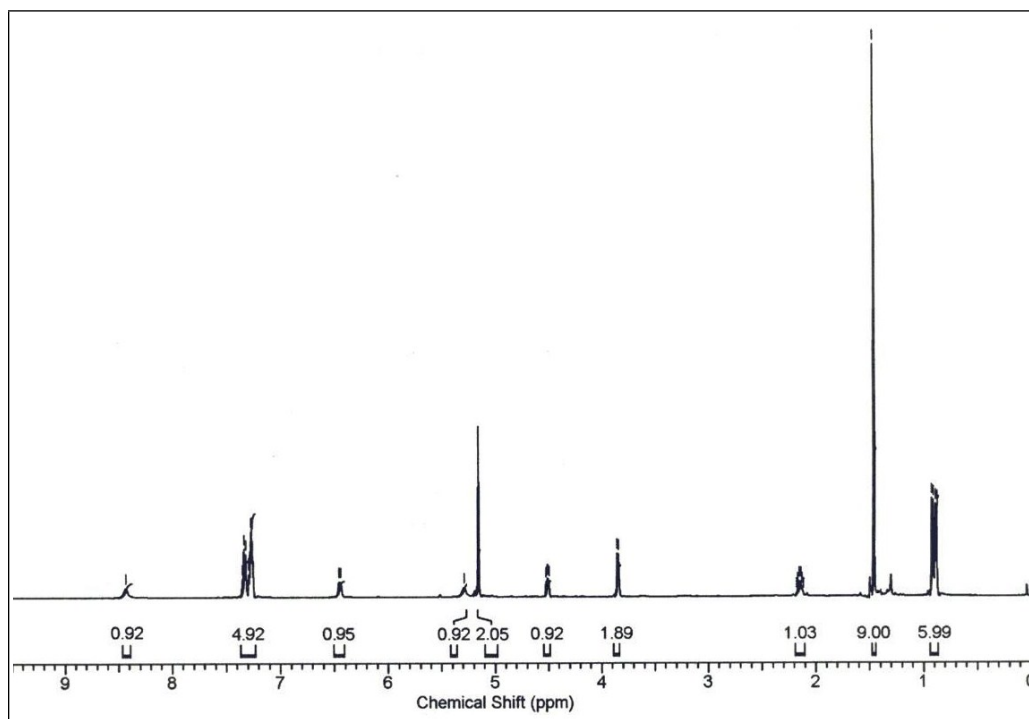

### $^1\text{H}$ NMR Spectrum of Compound Boc-Gly- $\psi$ [CONHCO]-Val-Cbz 4f

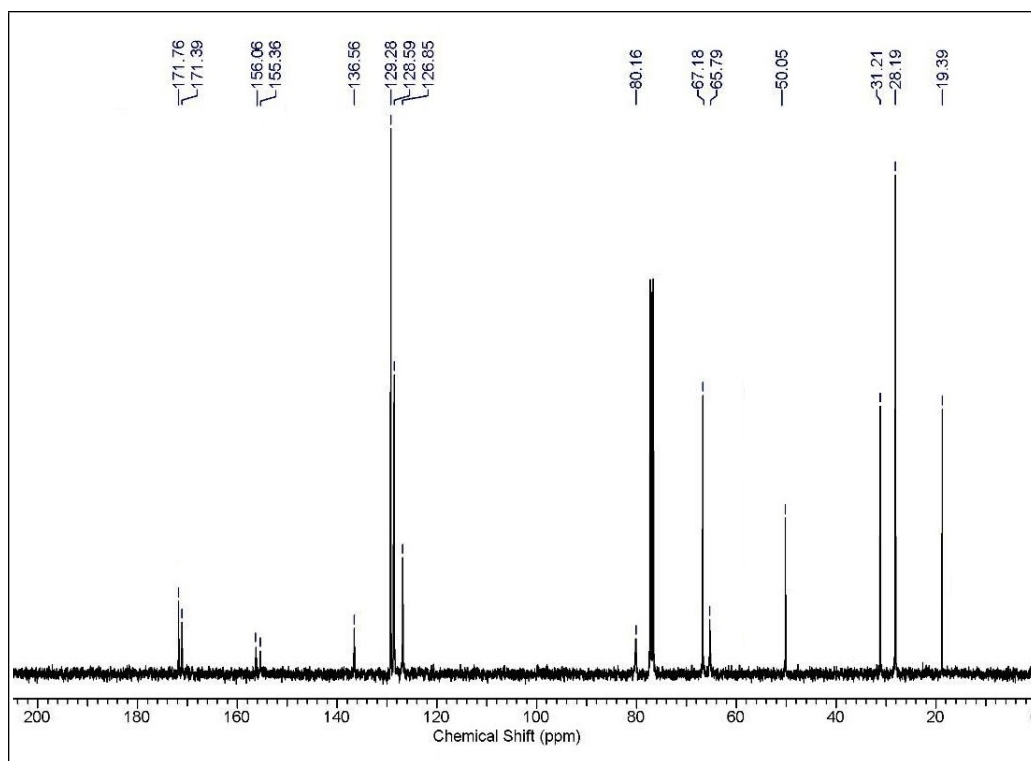

**<sup>13</sup>C NMR Spectrum of Compound Boc-Gly-ψ[CONHCO]-Val-Cbz 4f**

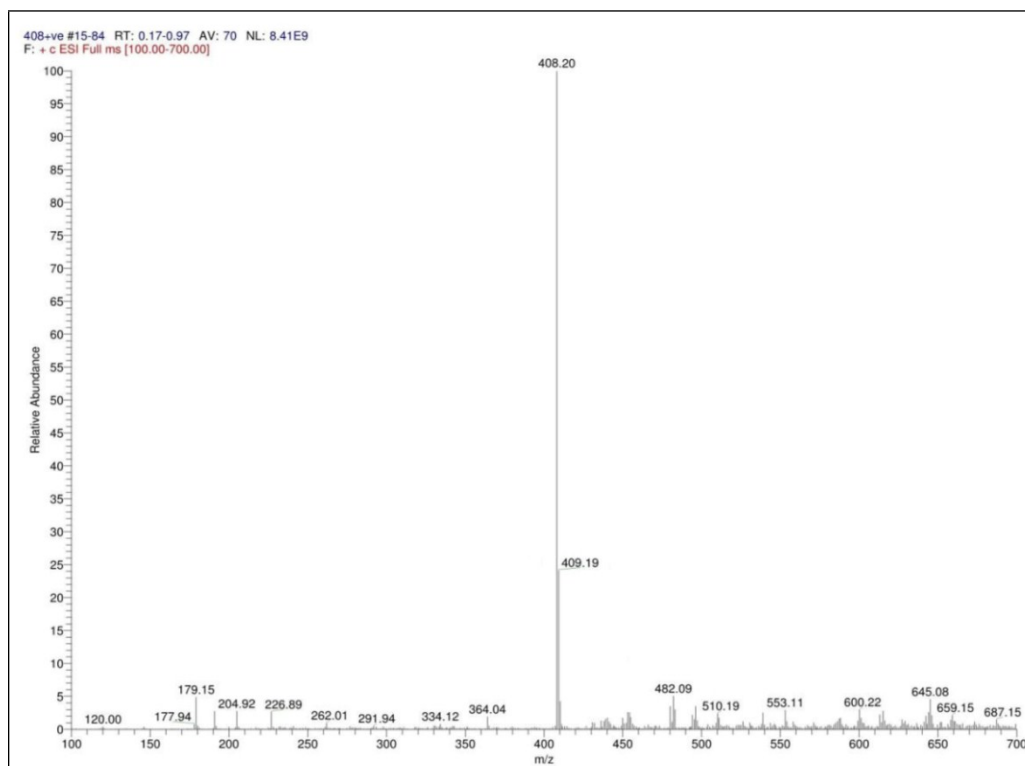

**ESMS of Compound Boc-Gly-ψ[CONHCO]-Val-Cbz 4f**

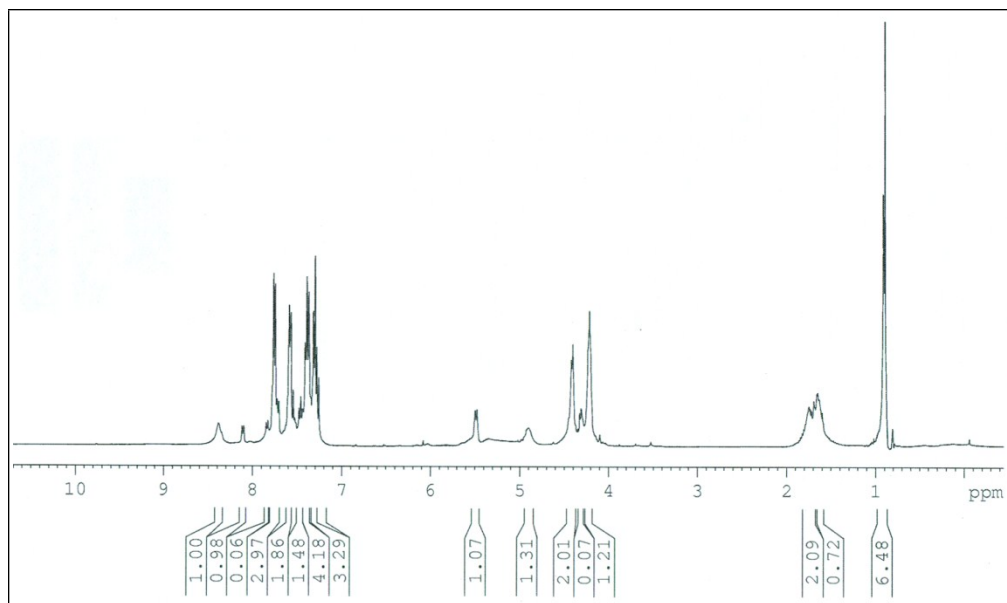

**<sup>1</sup>H NMR Spectrum of Compound Fmoc-Leu-ψ[CONHCO]-Ph 4g**

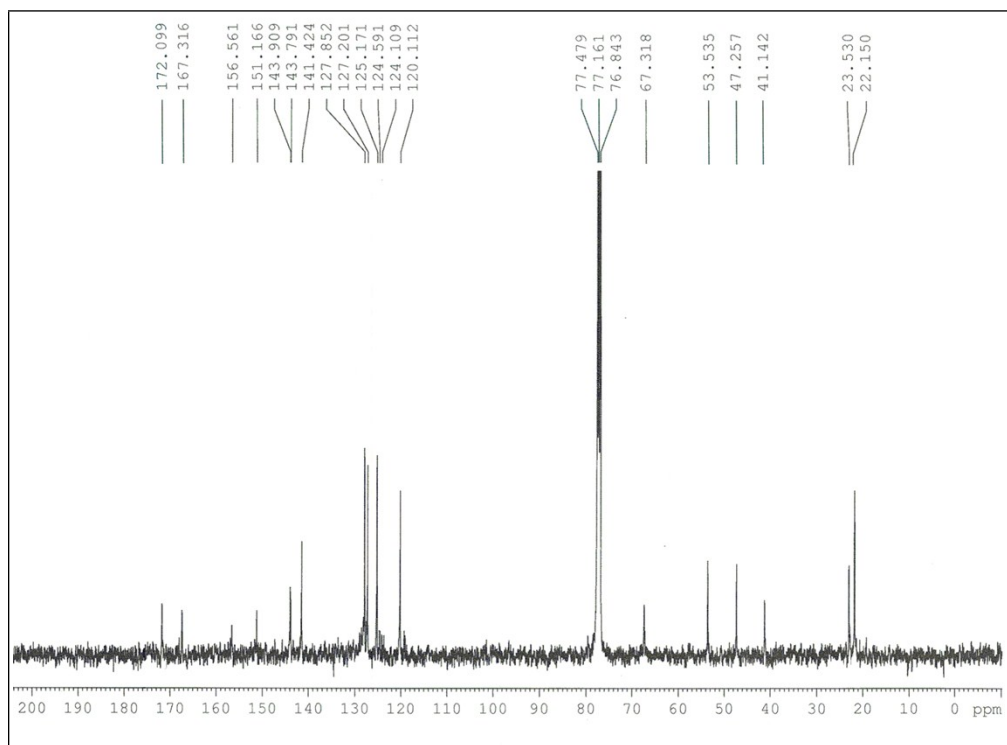

**<sup>13</sup>C NMR Spectrum of Compound Fmoc-Leu-ψ[CONHCO]-Ph 4g**

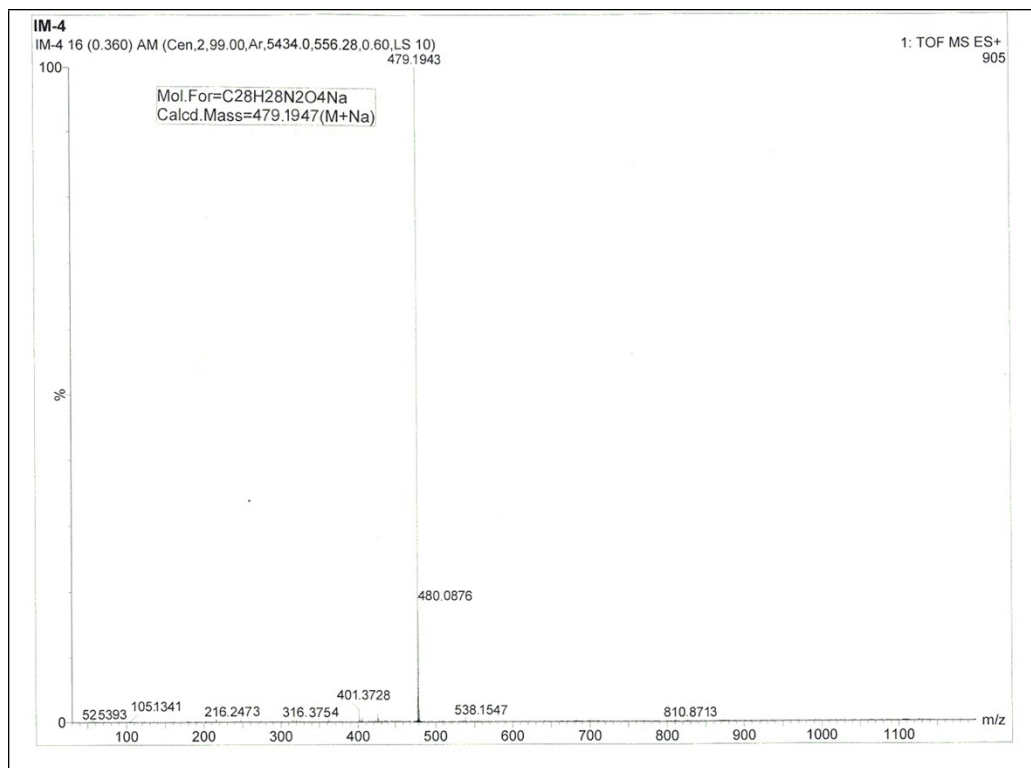

**HRMS of Compound Fmoc-Leu- $\psi$ [CONHCO]-Ph 4g**

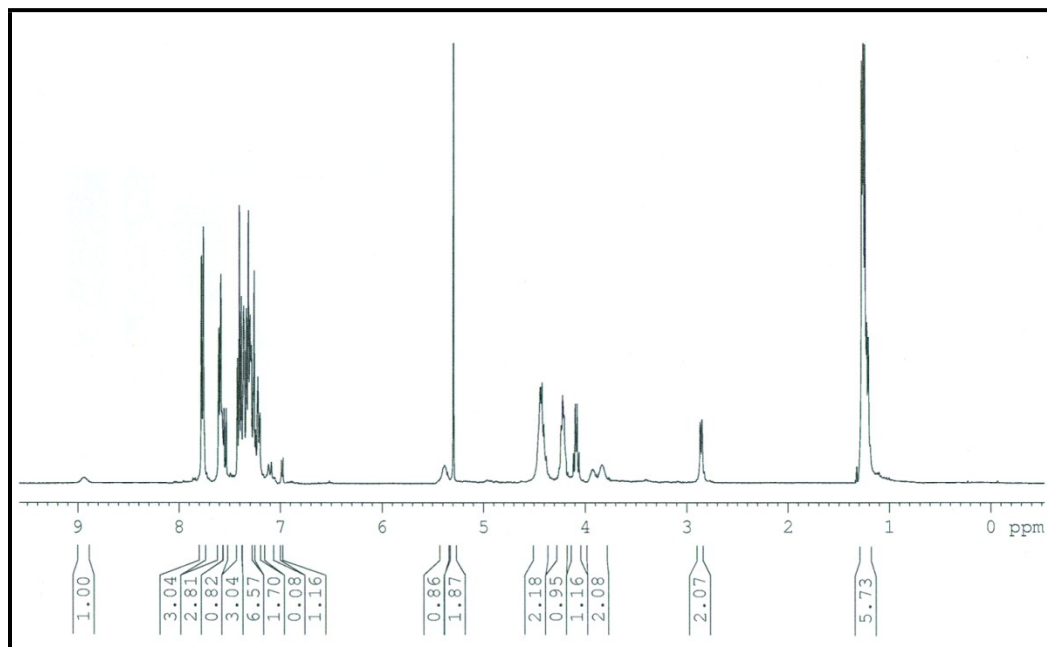

**<sup>1</sup>H NMR Spectrum of Compound Cbz-Ala-Phe- $\psi$ [CONHCO]-Ala-Fmoc 8a**

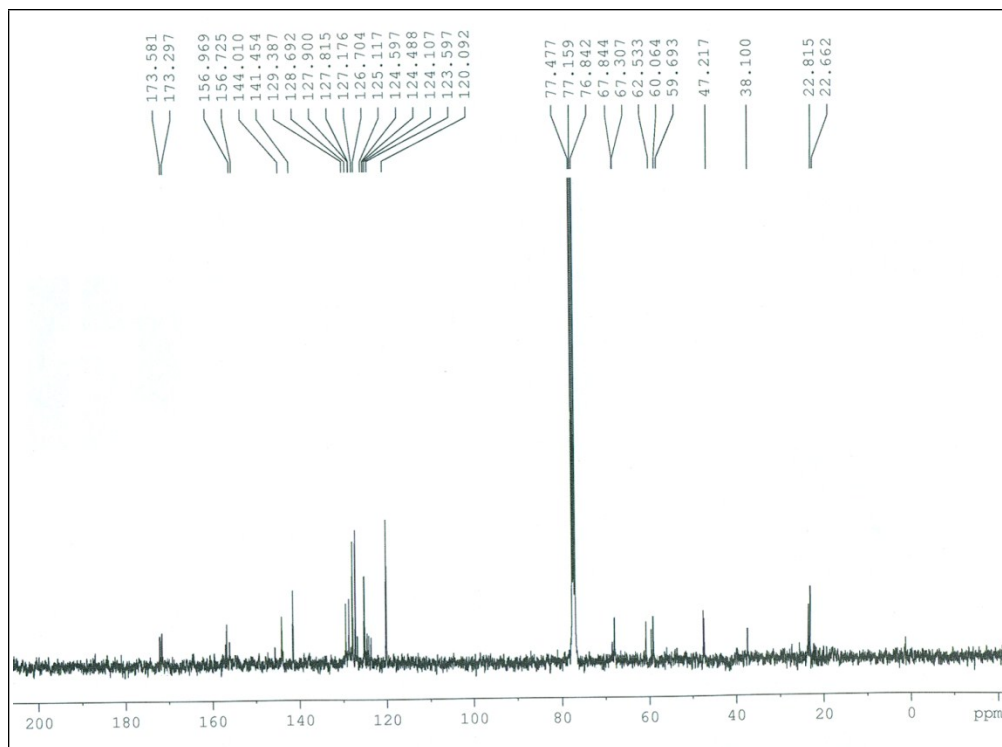

**<sup>13</sup>C NMR Spectrum of Compound Cbz-Ala-Phe-ψ[CONHCO]-Ala-Fmoc 8a**

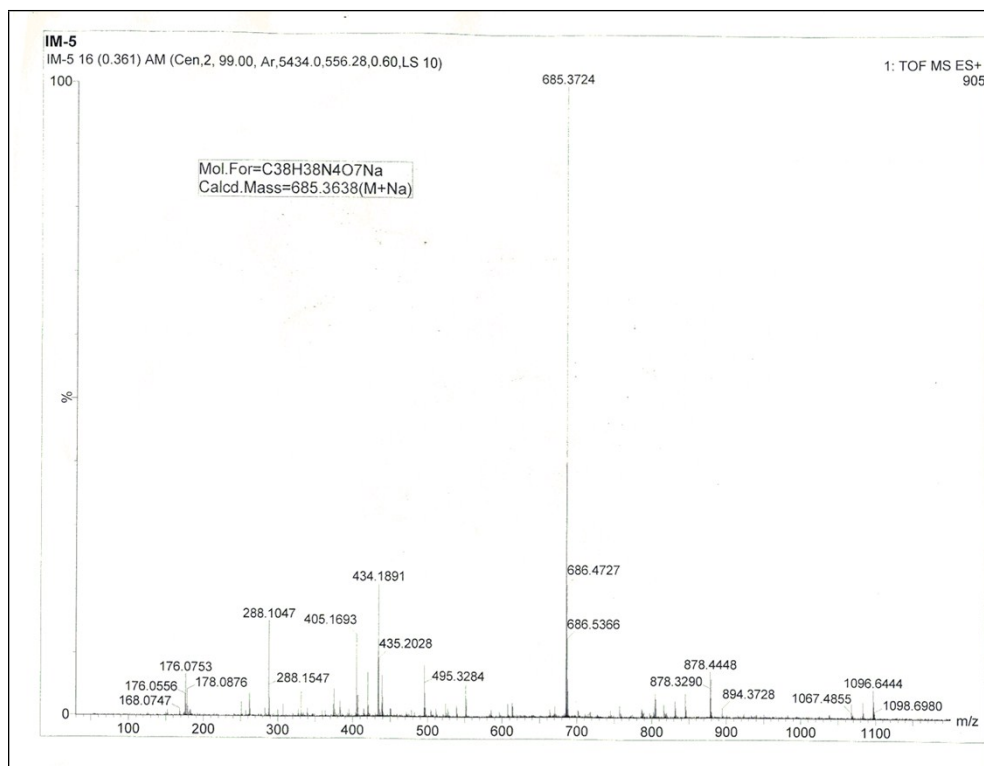

**HRMS of Compound Cbz-Ala-Phe-ψ[CONHCO]-Ala-Fmoc 8a**

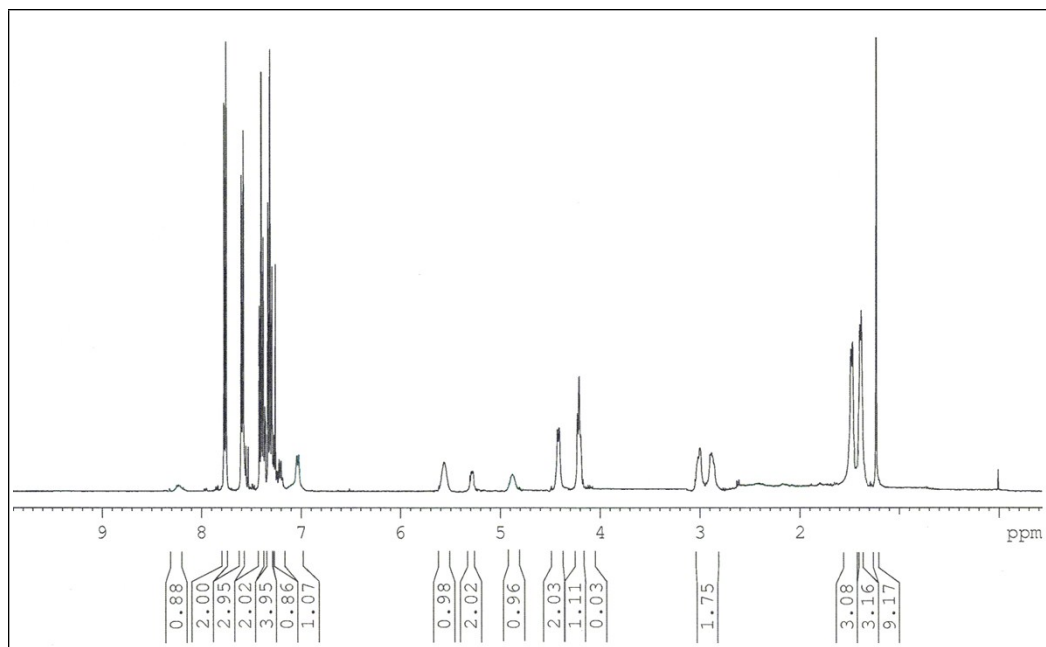

**<sup>1</sup>H NMR Spectrum of Compound Boc-Ala-Phe-ψ[CONHCO]-Ala-Fmoc 8b**

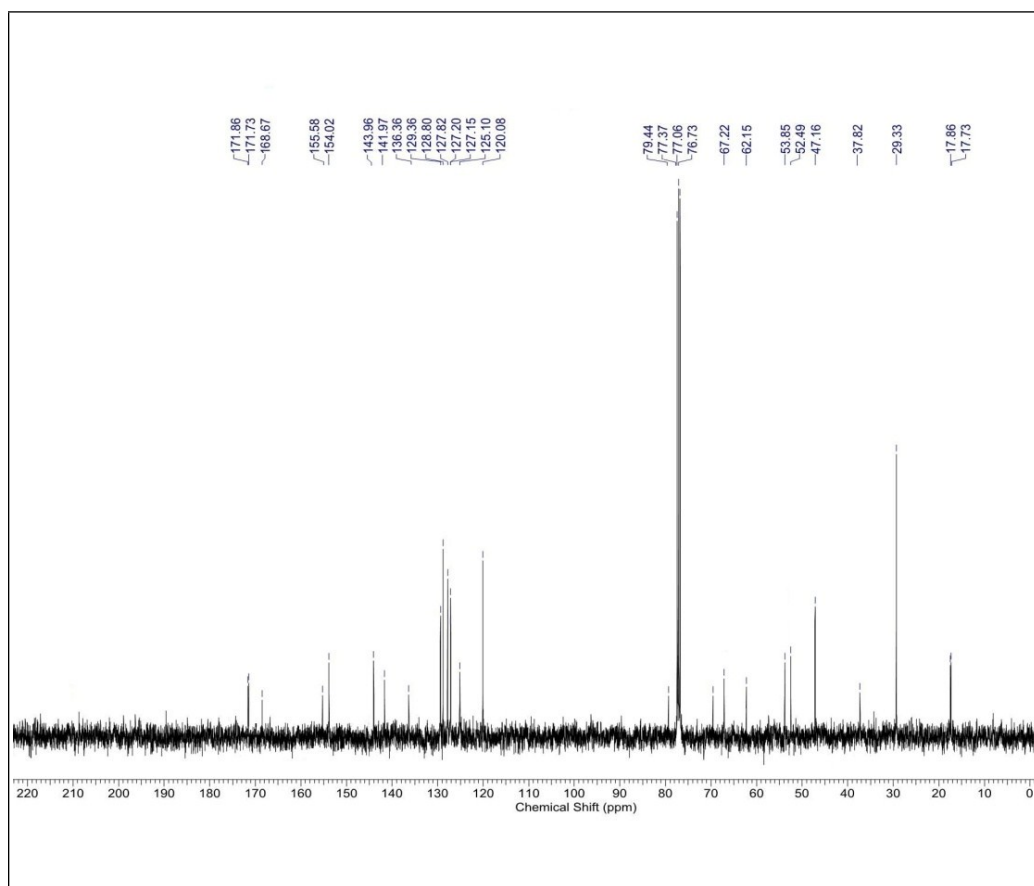

**<sup>13</sup>C NMR Spectrum of Compound Boc-Ala-Phe-ψ[CONHCO]-Ala-Fmoc 8b**

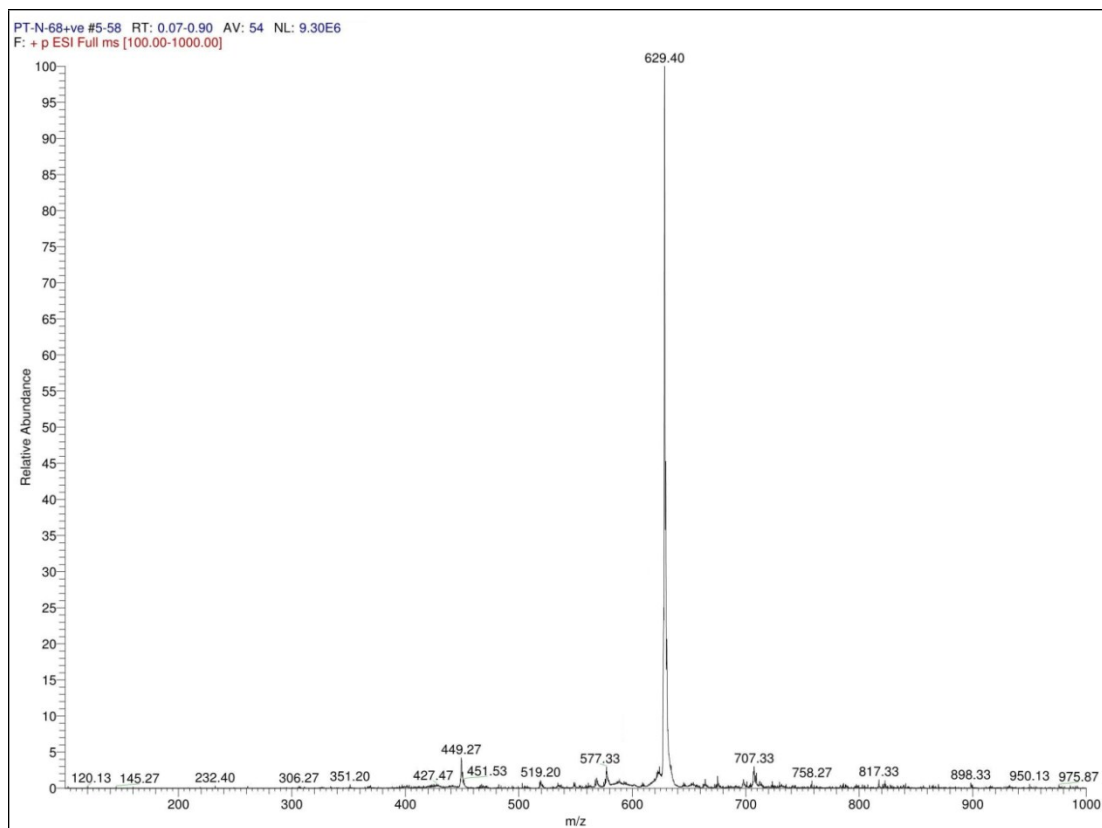

**ESMS of Compound Boc-Ala-Phe- $\psi$ [CONHCO]-Ala-Fmoc 8b**

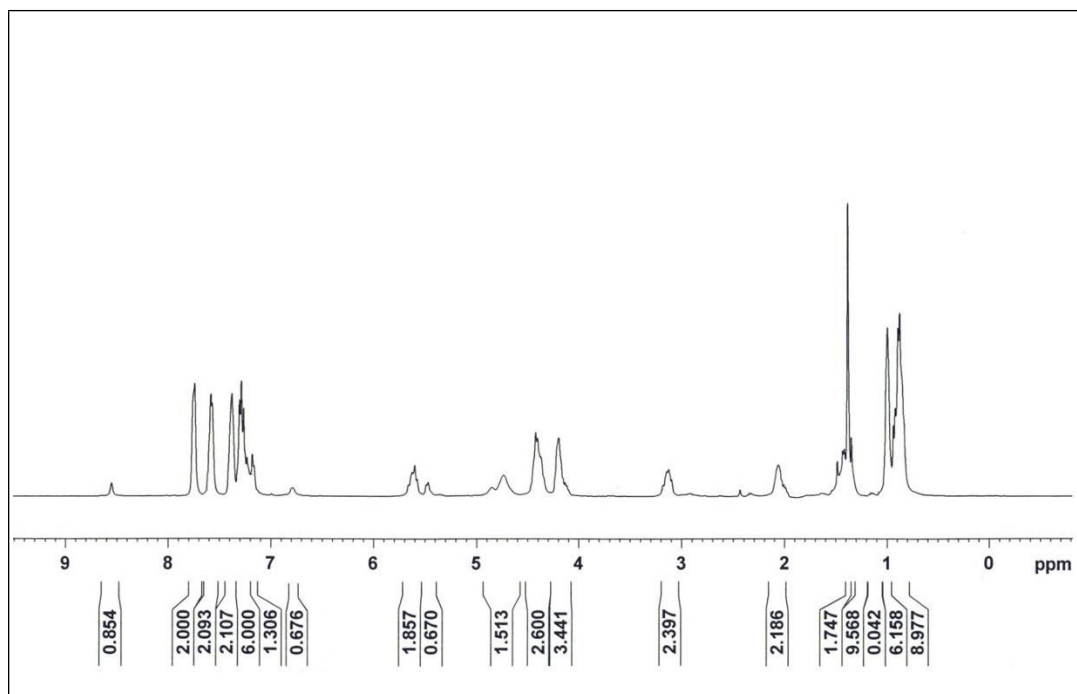

**$^1\text{H}$  NMR Spectrum of Compound Boc-Phe-Val- $\psi$ [CONHCO]-Ile-Fmoc 8c**

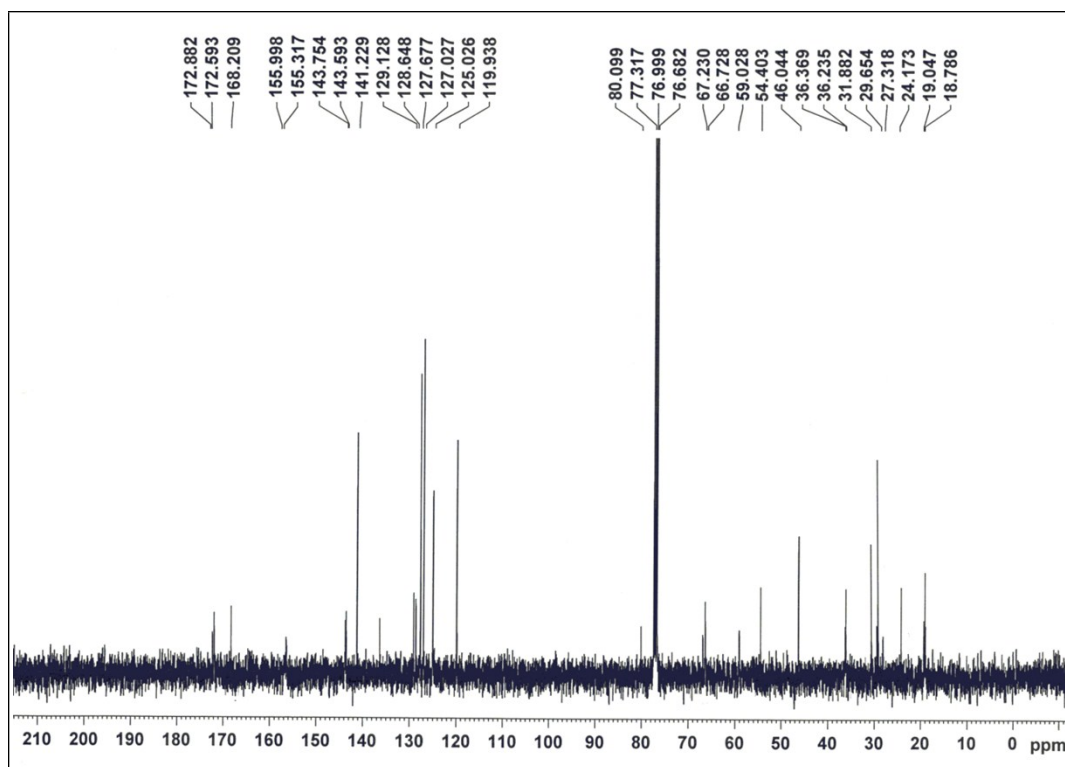

**<sup>13</sup>C NMR Spectrum of Compound Boc-Phe-Val-ψ[CONHCO]-lle-Fmoc 8c**

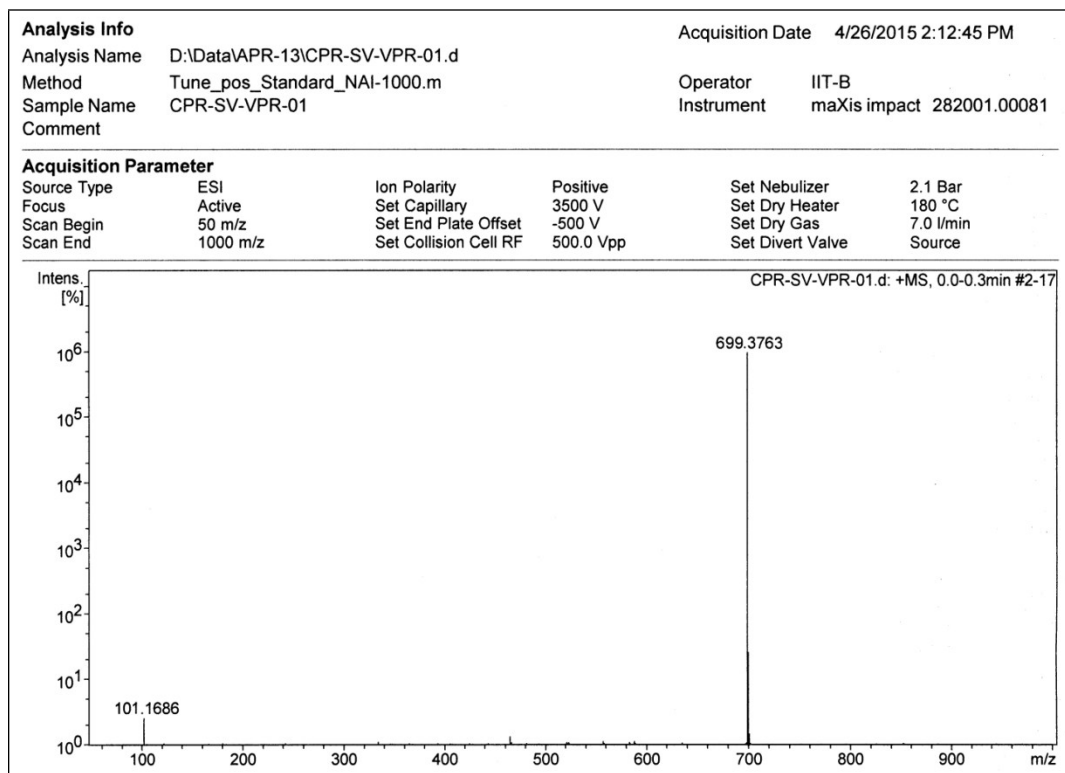

**HRMS of Compound Boc-Phe-Val-ψ[CONHCO]-lle-Fmoc 8c**

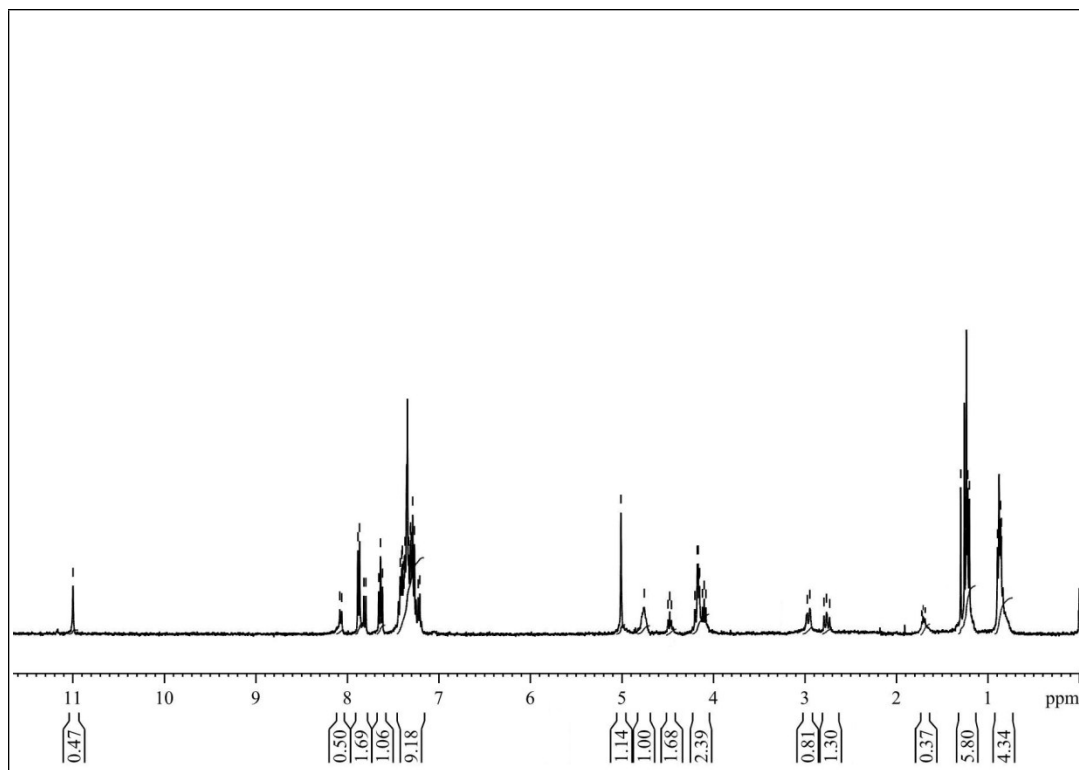

**<sup>1</sup>H NMR Spectrum of Compound Cbz-Ala-Leu-ψ[CONHCO]-Phe-Fmoc 8d**

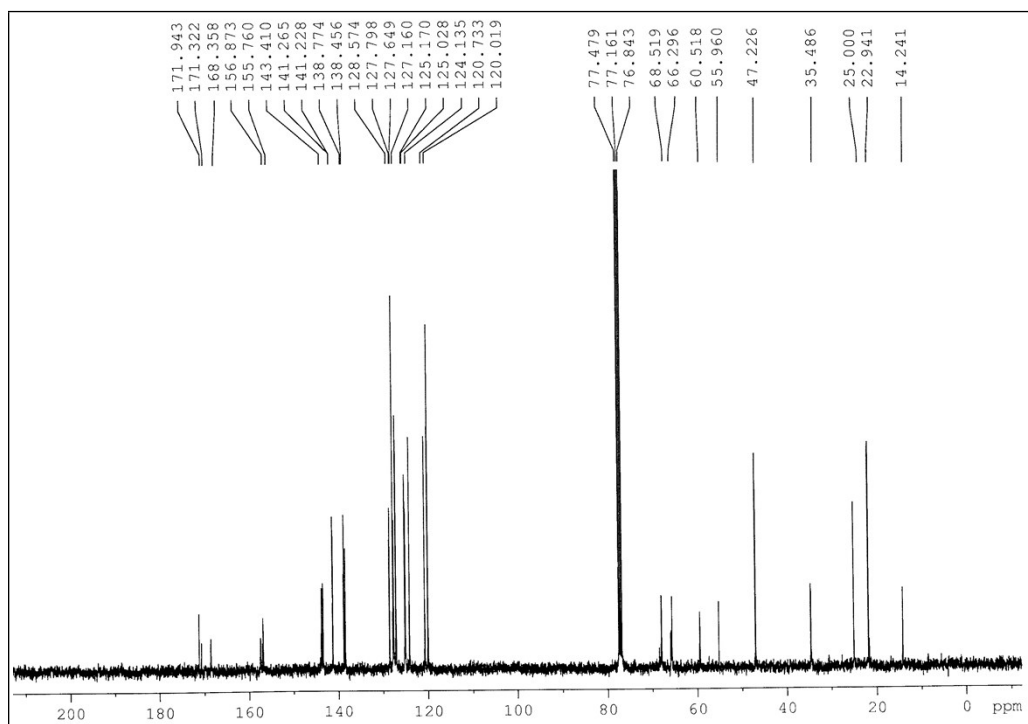

**<sup>13</sup>C NMR Spectrum of Compound Cbz-Ala-Leu-ψ[CONHCO]-Phe-Fmoc 8d**

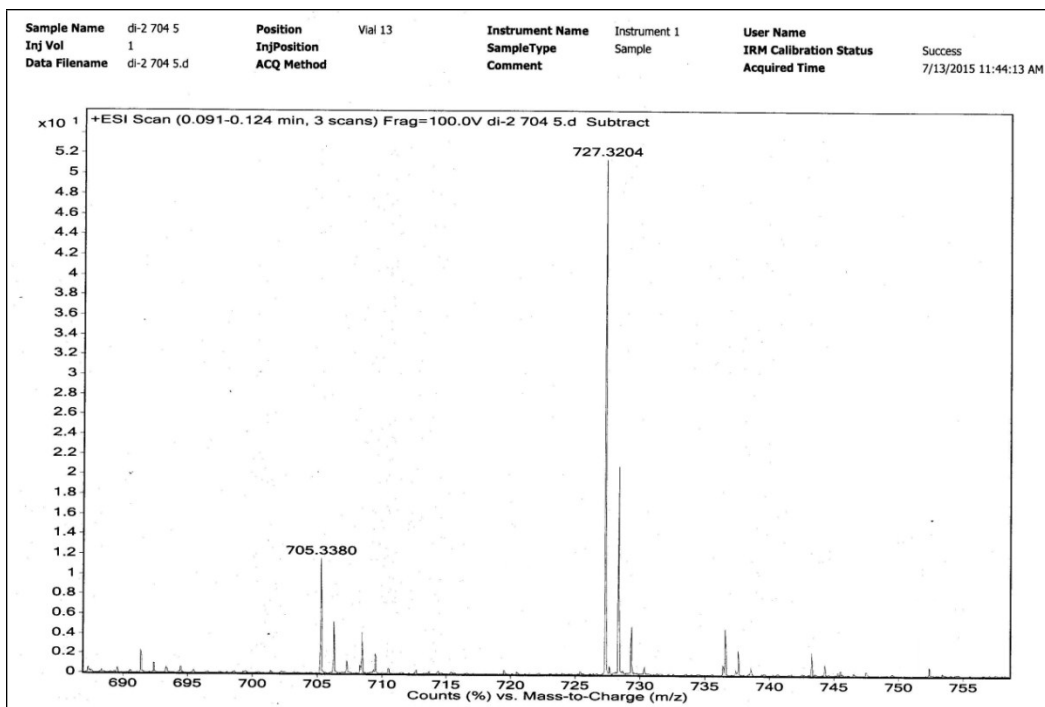

**HRMS of Compound Cbz-Ala-Leu- $\psi$ [CONHCO]-Phe-Fmoc 8d**

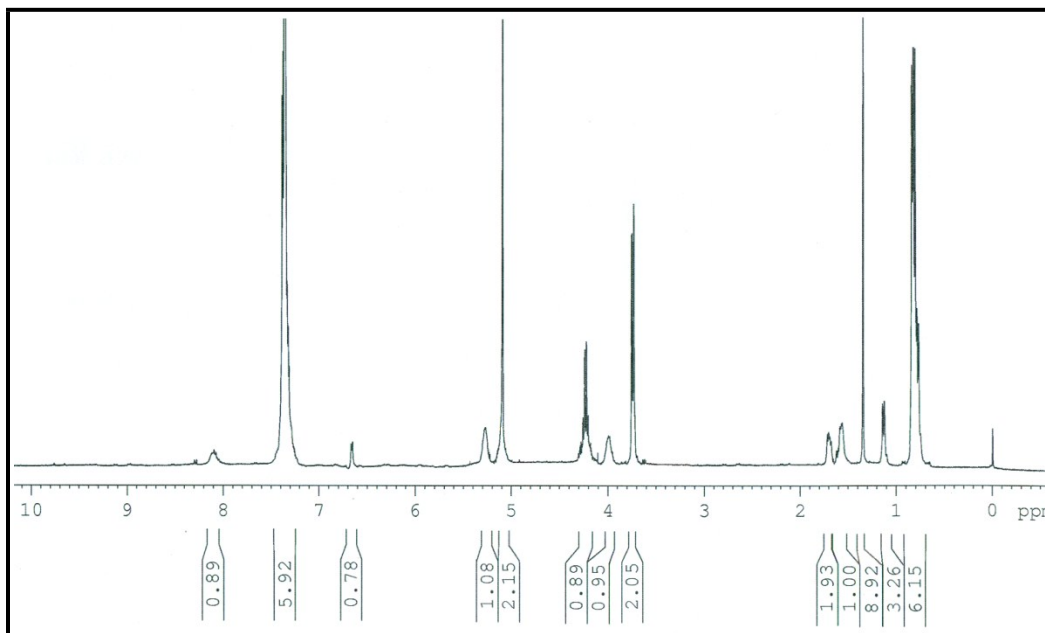

**$^1\text{H}$  NMR Spectrum of Compound Boc-Ala-Leu- $\psi$ [CONHCO]-Gly-Cbz 8e**

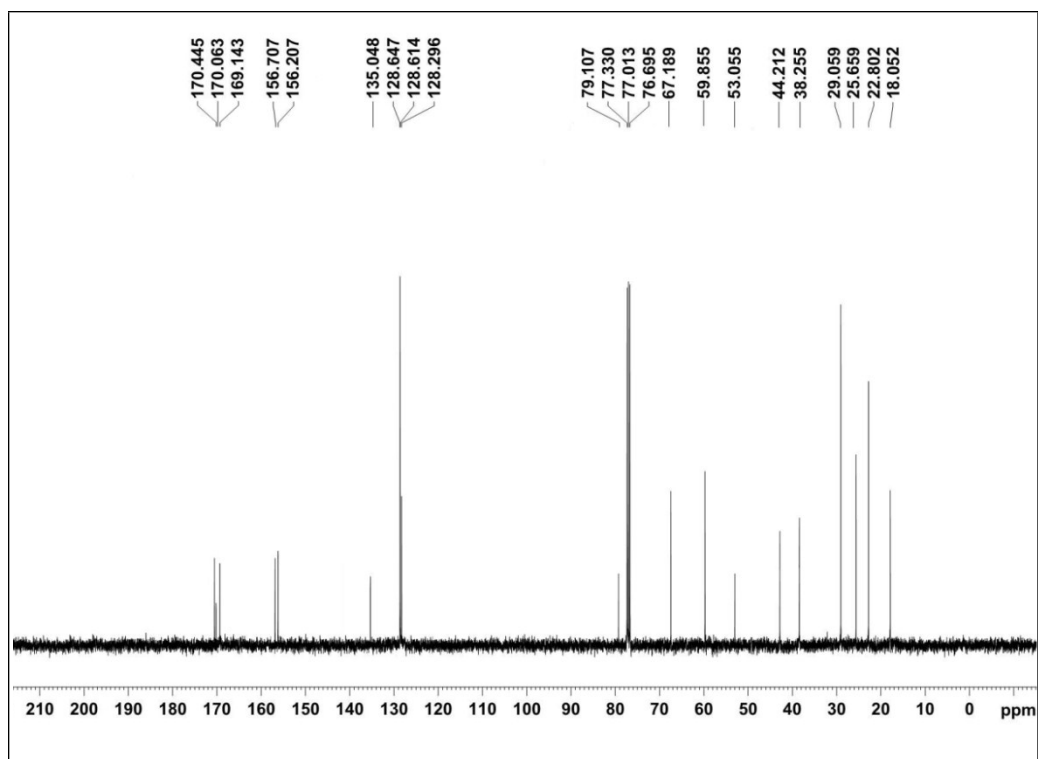

**<sup>13</sup>C NMR Spectrum of Compound Boc-Ala-Leu-ψ[CONHCO]-Gly-Cbz 8e**

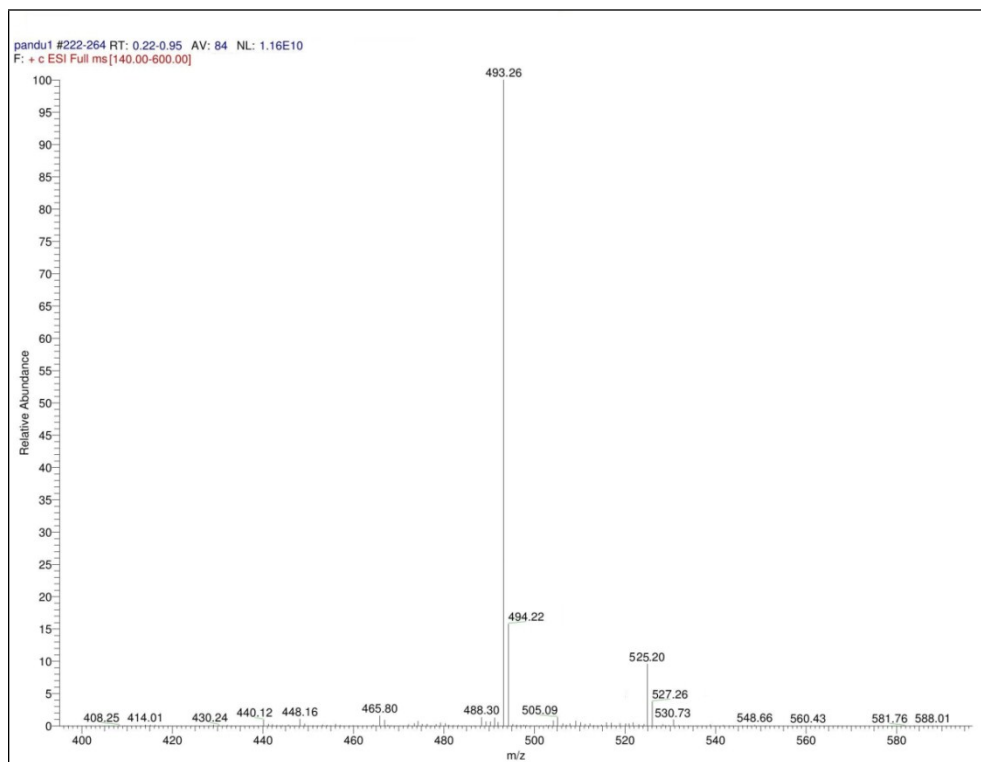

**ESMS of Compound Boc-Ala-Leu-ψ[CONHCO]-Gly-Cbz 8e**

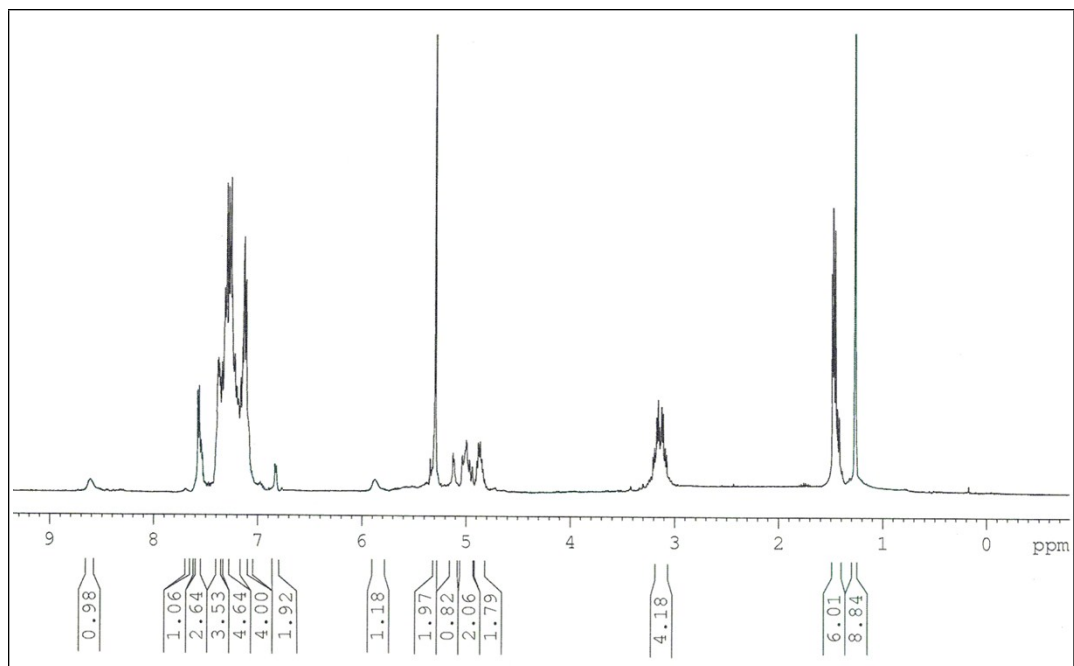

**<sup>1</sup>H NMR Spectrum of Compound Boc-Ala-Phe-ψ[CONHCO]-Phe-Ala-Cbz 8f**

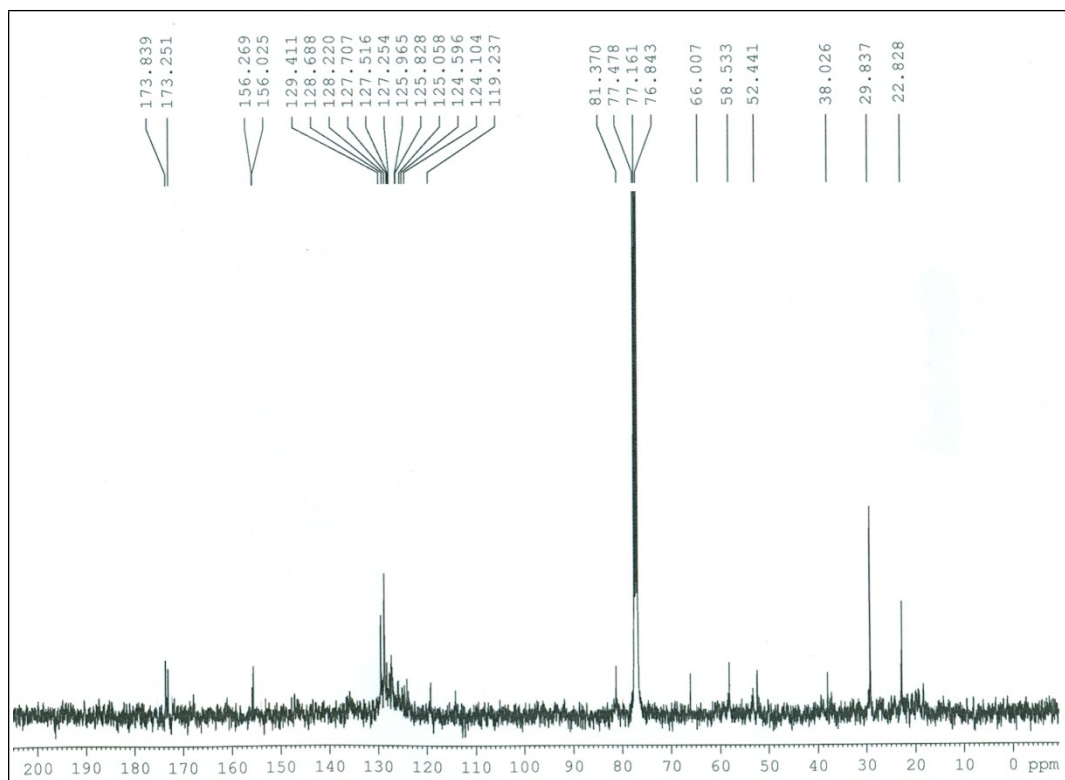

**<sup>13</sup>C NMR Spectrum of Compound Boc-Ala-Phe-ψ[CONHCO]-Phe-Ala-Cbz 8f**

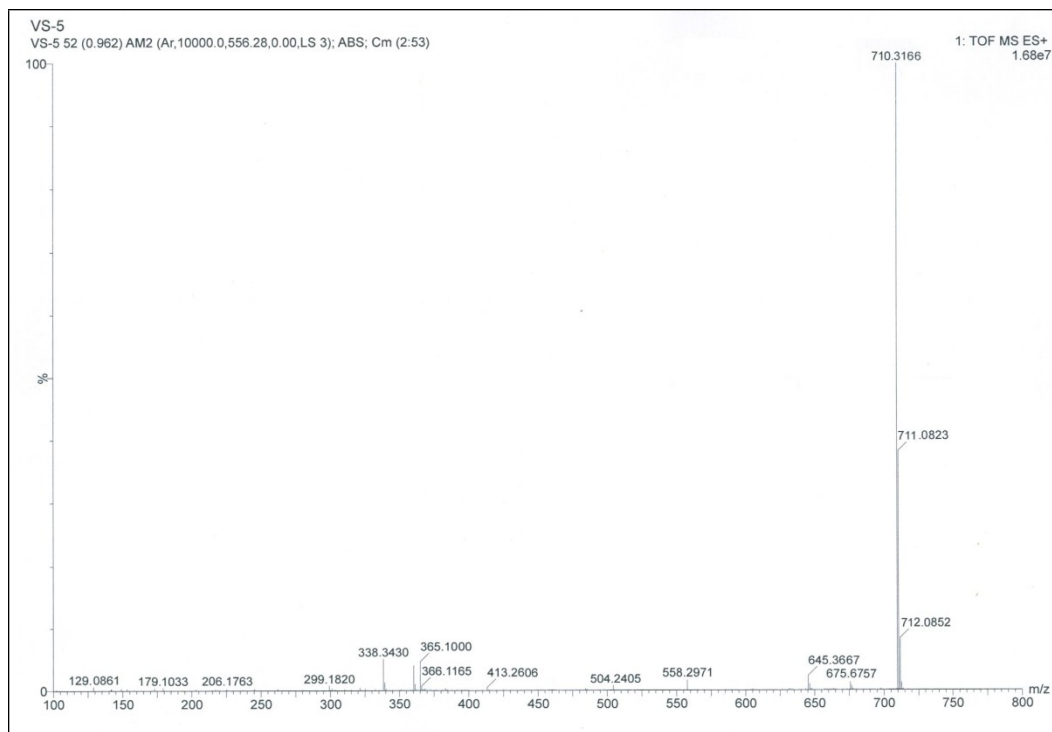

**HRMS of Compound Boc-Ala-Phe- $\psi$ [CONHCO]-Phe-Ala-Cbz 8f**

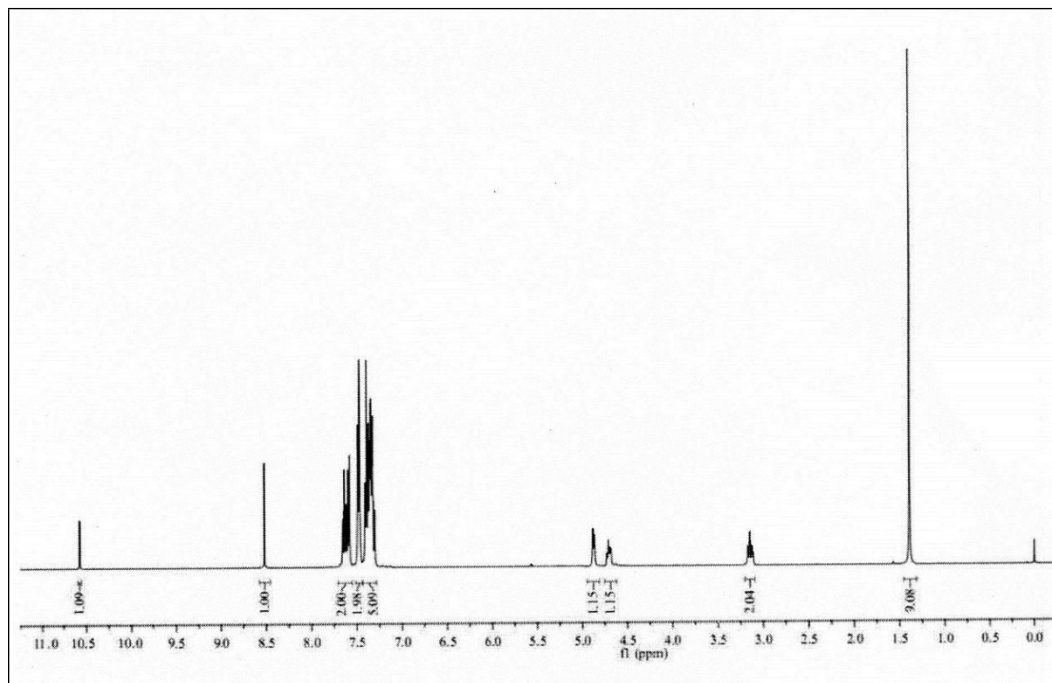

**$^1\text{H}$  NMR Spectrum of Compound (S)-tert-butyl(1-oxo-1-(2-oxo-2H-chromene-3-carboxamido)-3-phenylpropan-2-yl)carbamate 10a**

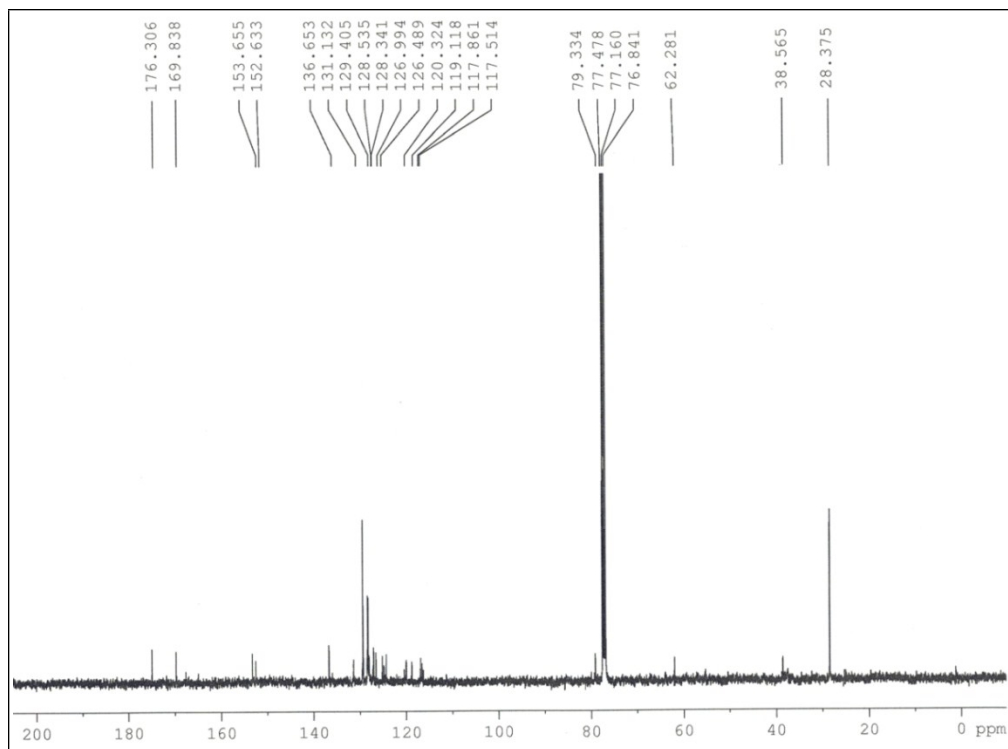

**<sup>13</sup>C NMR Spectrum of Compound (S)-tert-butyl(1-oxo-1-(2-oxo-2H-chromene-3-carboxamido)-3-phenylpropan-2-yl)carbamate 10a**

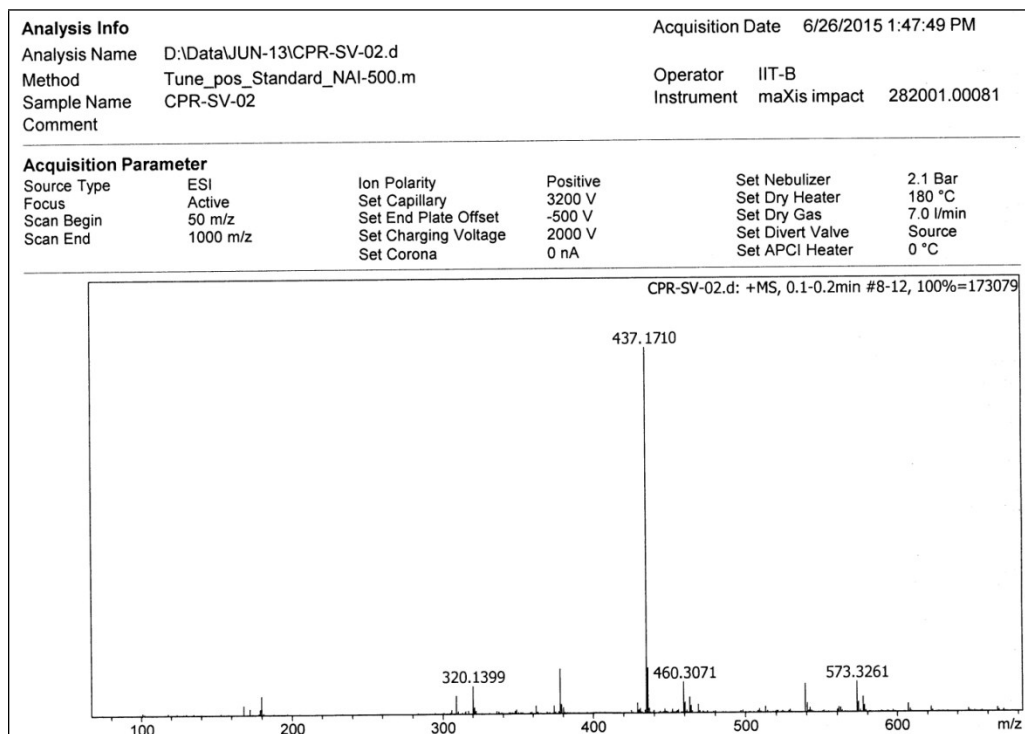

**HRMS Spectrum of Compound (S)-tert-butyl(1-oxo-1-(2-oxo-2H-chromene-3-carboxamido)-3-phenylpropan-2-yl)carbamate 10a**

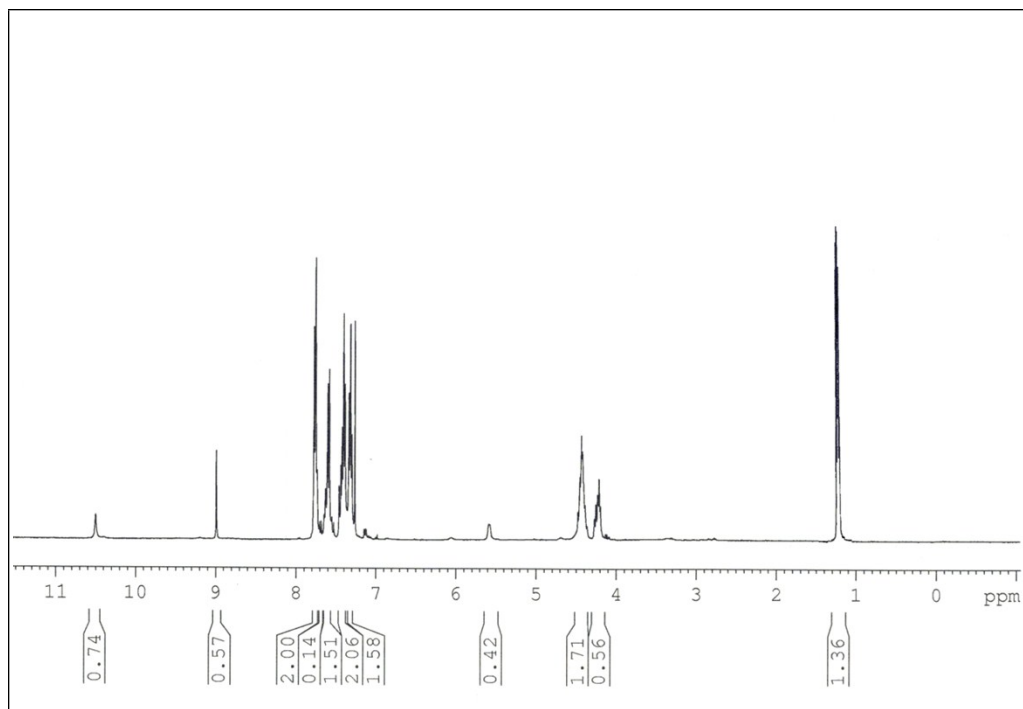

**<sup>1</sup>H NMR Spectrum of Compound (S)-(9H-fluoren-9-yl)methyl(1-oxo-1-(2-oxo-2H-chromene-3-carboxamido)propan-2-yl)carbamate 10b**

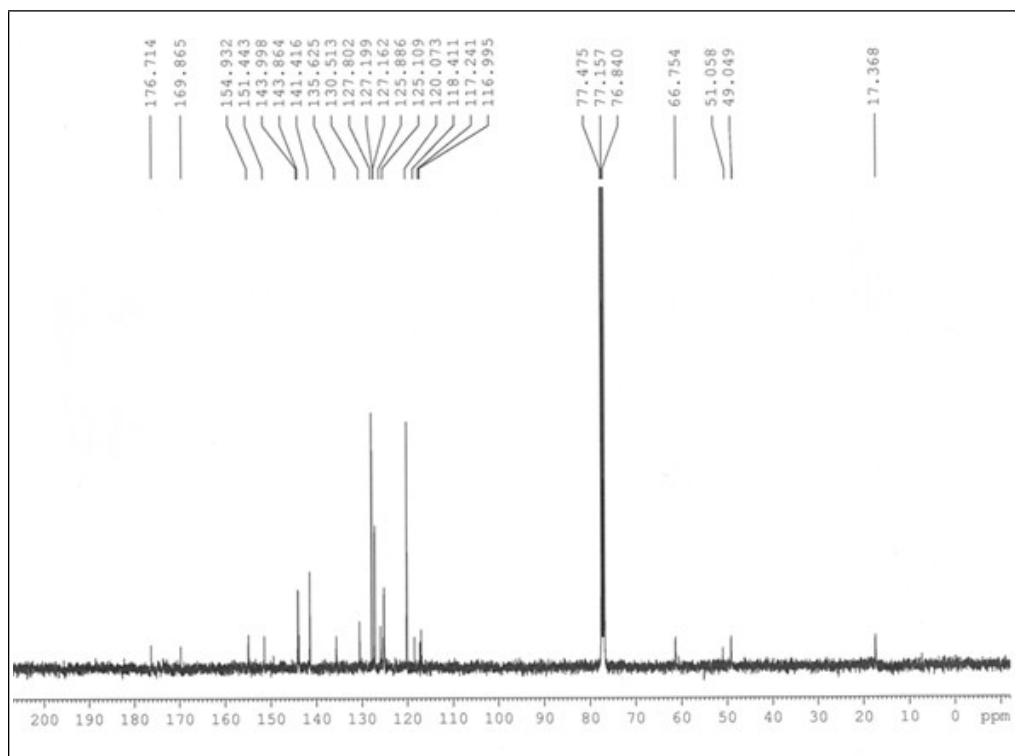

**<sup>13</sup>C NMR Spectrum of Compound (S)-(9H-fluoren-9-yl)methyl(1-oxo-1-(2-oxo-2H-chromene-3-carboxamido)propan-2-yl)carbamate 10b**

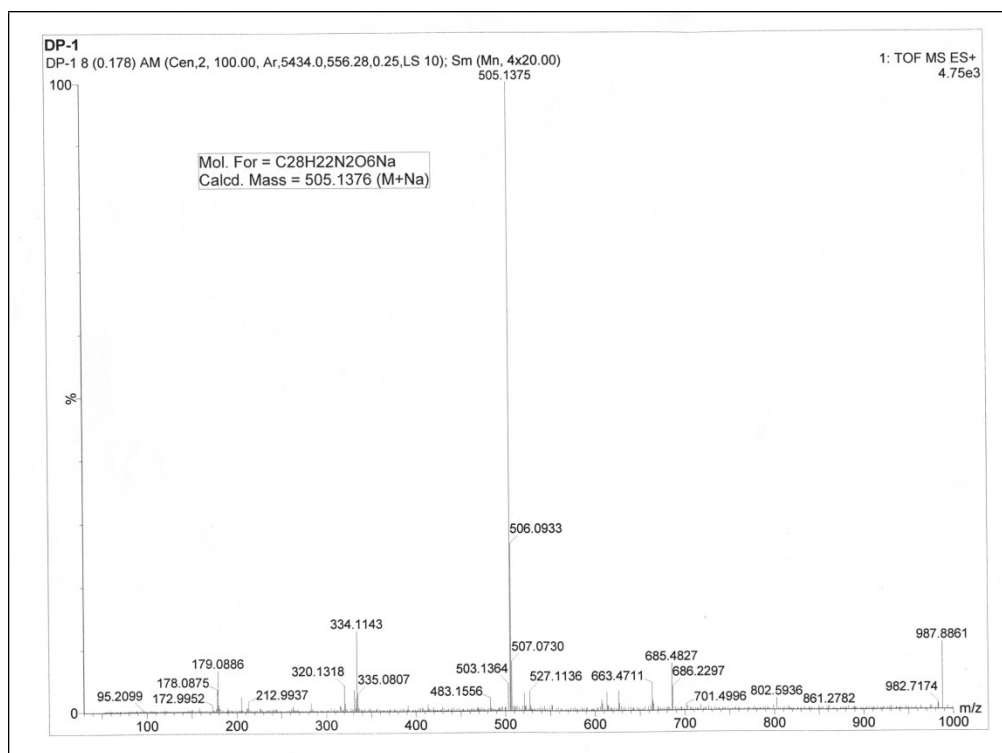

**HRMS Spectrum of Compound (S)-(9H-fluoren-9-yl)methyl(1-oxo-1-(2-oxo-2H-chromene-3-carboxamido)propan-2-yl)carbamate 10b**

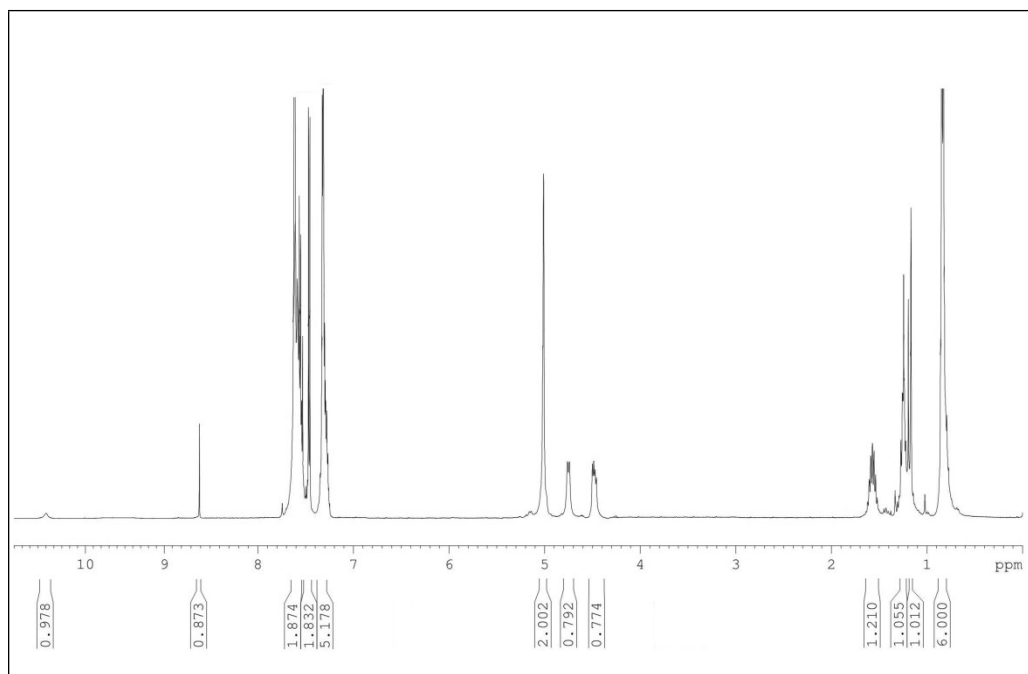

**<sup>1</sup>H NMR Spectrum of Compound (S)-benzyl(4-methyl-1-oxo-1-(2-oxo-2H-chromene-3-carboxamido)pentan-2-yl)carbamate 10c**

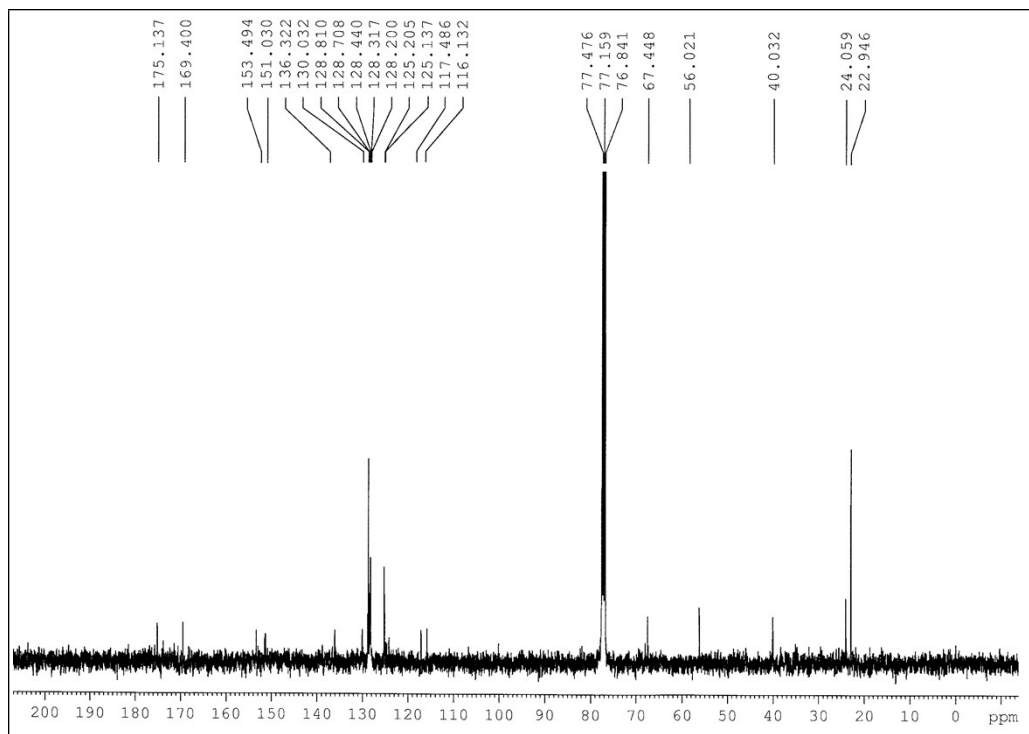

**<sup>13</sup>C NMR Spectrum of Compound (S)-benzyl(4-methyl-1-oxo-1-(2-oxo-2H-chromene-3-carboxamido)pentan-2-yl)carbamate 10c**

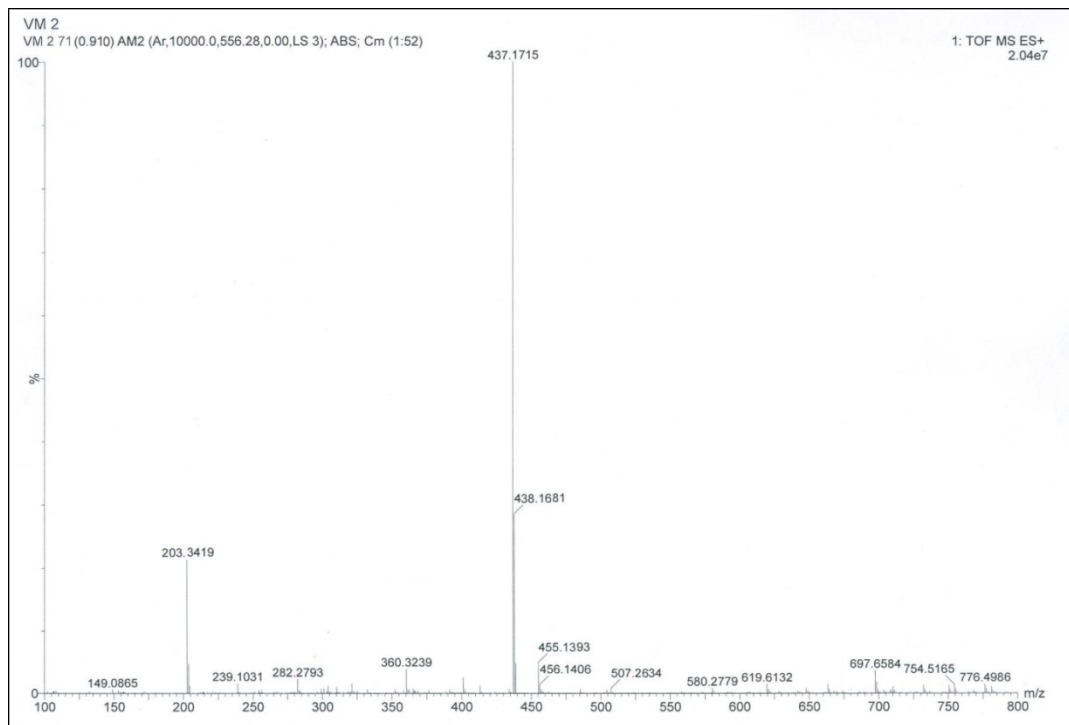

**HRMS Spectrum of Compound (S)-benzyl(4-methyl-1-oxo-1-(2-oxo-2H-chromene-3-carboxamido)pentan-2-yl)carbamate 10c**
